# Supplementary material for: Early Lung Carcinogenesis and Tumor Microenvironment Observed by Single-Cell Transcriptome Analysis
Source: Research Square preprint supplement (doi:10.21203/rs.3.rs-735382/v1), 2021-07-29
Supplement: Supplementary file 1 [file d7b18877cfd1f4aa0ffc40f1.xlsx]

## Sheet: Table_E1
Table E1. Lung tissue samples and quality of the dataset.
Case	Sample Type	Type of Sequencer	10X version	Read count (R1 + R2 Total)	GC (%)	Q20(%)	Q30(%)	Mitochondrial fraction (median [Q1 ~ Q3])
Case_01_NL	Adjacent normal appearing lung tissue	HiSeqXten	V3	960546892	46.8	98.5	96.43	6.893 [4.993 ~ 10.245]
Case_01_Tu	Tumor	HiSeqXten	V3	935880520	46.03	98.36	96.11	13.913 [8.135 ~31.616]
Case_02_NL	Adjacent normal appearing lung tissue	HiSeqXten	V3	862210368	46.03	97.5	94.08	7.389 [5.511 ~ 10.211]
Case_02_Tu	Tumor	HiSeqXten	V3	864172120	45.72	97.46	93.96	21.239 [9.817 ~ 39.467]
Case_03_NL	Adjacent normal appearing lung tissue	HiSeqXten	V3	774035530	46.12	97.17	93.35	3.859 [ 2.453 ~ 5.565]
Case_03_Tu	Tumor	HiSeqXten	V3	818228216	46.8	97.63	94.37	6.254 [3.757 ~ 10.336]
Case_04_NL	Adjacent normal appearing lung tissue	HiSeqXten	V3	823367134	46.98	97.13	93.21	4.935 [3.378 ~ 7.187]
Case_04_Tu	Tumor	HiSeqXten	V3	807787526	46.53	97.03	92.97	4.236 [ 2.774 ~ 6.670]
Case_05_NL	Adjacent normal appearing lung tissue	HiSeqXten	V3	805729654	47.48	96.99	93.05	4.215 [2.349 ~ 6.275]
Case_05_Tu	Tumor	HiSeqXten	V3	842504826	45.98	97.58	94.27	5.088 [2.221 ~ 9.854]
Case_06_Tu	Tumor	HiSeqXten	V3	809097924	47.71	96.93	92.89	4.145 [ 2.393 ~ 7.213]

## Sheet: Table_E2
Table E2. DEG between lung cancer cells vs. normal lung epithelial cells.
Gene name	avg_logFC*	pct.1**	pct.2†	p_value	p_val_adjust‡
SPINK1	2.11959	0.47	0.056	0	0
NAPSA	1.89118	0.951	0.199	0	0
HOPX	1.58092	0.928	0.371	0	0
LPCAT1	1.5289	0.844	0.186	0	0
AREG	1.47809	0.844	0.451	0	0
LAPTM4B	1.43056	0.805	0.214	0	0
NEAT1	1.38492	0.949	0.884	0	0
SFTPB	1.37298	0.976	0.398	0	0
CEACAM6	1.36579	0.852	0.414	0	0
CTSH	1.34259	0.941	0.745	0	0
DRAM1	1.31487	0.819	0.18	0	0
TRAM1	1.30314	0.871	0.604	0	0
LY6E	1.30068	0.912	0.716	0	0
RNASE1	1.29339	0.905	0.394	0	0
CEACAM5	1.28786	0.536	0.033	0	0
ADGRF5	1.21831	0.869	0.435	0	0
SFTA2	1.21602	0.867	0.218	0	0
MUC1	1.16428	0.927	0.708	0	0
ENO1	1.16137	0.886	0.691	0	0
ABCC3	1.15155	0.745	0.096	0	0
SLC34A2	1.13793	0.902	0.719	0	0
NPC2	1.12656	0.904	0.769	0	0
C4BPA	1.11085	0.485	0.158	0	0
APLP2	1.09605	0.933	0.818	0	0
GEM	1.08888	0.597	0.152	0	0
TMSB4X	1.08595	0.993	0.946	0	0
MALL	1.08595	0.793	0.307	0	0
BST2	1.08211	0.768	0.288	0	0
TCIM	1.06579	0.606	0.168	0	0
HSPA6	1.0617	0.369	0.099	0	0
TMSB10	1.04939	0.974	0.928	0	0
DUSP6	1.03947	0.717	0.325	0	0
IFI27	1.02886	0.884	0.677	0	0
AKAP13	1.01589	0.886	0.603	0	0
MALAT1	1.01114	0.997	0.98	0	0
DLC1	1.00299	0.79	0.188	0	0
GGTLC1	0.99369	0.666	0.059	0	0
GLS	0.971318	0.821	0.446	0	0
PLCG2	0.933071	0.629	0.341	0	0
MSLN	0.930052	0.668	0.198	0	0
SERPINA1	0.929548	0.593	0.332	0	0
TKT	0.92152	0.858	0.599	0	0
TM4SF1	0.919246	0.844	0.432	0	0
CPM	0.914396	0.811	0.257	0	0
ATP11A	0.902883	0.756	0.2	0	0
CIT	0.899625	0.607	0.095	0	0
ASPH	0.87968	0.747	0.428	0	0
JPT1	0.876127	0.752	0.445	0	0
FGD6	0.866429	0.701	0.143	0	0
PDLIM3	0.866101	0.478	0.078	0	0
TAGLN2	0.860904	0.896	0.769	0	0
EEF1D	0.83858	0.903	0.796	0	0
JUN	0.83654	0.977	0.901	0	0
MAL2	0.835102	0.847	0.641	0	0
FAM84B	0.825256	0.739	0.314	0	0
SLC16A7	0.823714	0.615	0.119	0	0
S100A10	0.800574	0.936	0.788	0	0
OCLN	0.799511	0.774	0.426	0	0
SOX4	0.793014	0.898	0.77	0	0
SDC1	0.782956	0.728	0.283	0	0
VWA1	0.782224	0.675	0.301	0	0
ICAM1	0.781956	0.78	0.39	0	0
CITED2	0.773877	0.811	0.627	0	0
CADM1	0.767724	0.713	0.184	0	0
RCAN1	0.761085	0.585	0.246	0	0
MBNL1	0.757738	0.835	0.568	0	0
LPP	0.756793	0.772	0.421	0	0
SQSTM1	0.753742	0.91	0.82	0	0
MYO6	0.751262	0.837	0.566	0	0
FBP1	0.749641	0.703	0.335	0	0
PCSK1N	0.74384	0.526	0.25	0	0
STEAP4	0.741207	0.782	0.435	0	0
S100A14	0.737927	0.763	0.341	0	0
PABPC1	0.730456	0.923	0.825	0	0
XIST	0.729555	0.814	0.597	0	0
ACSL5	0.728719	0.614	0.157	0	0
SFN	0.726597	0.66	0.262	0	0
SUSD2	0.722807	0.697	0.219	0	0
TRIB1	0.719887	0.787	0.517	0	0
NKX2-1	0.717845	0.827	0.434	0	0
PIGR	0.716268	0.886	0.748	0	0
PLS3	0.716198	0.67	0.211	0	0
AQP1	0.714053	0.315	0.123	0	0
CD44	0.707082	0.717	0.267	0	0
SFTA3	0.706673	0.792	0.387	0	0
MUC21	0.704162	0.425	0.052	0	0
HSPG2	0.701178	0.648	0.169	0	0
PTPN13	0.691449	0.652	0.311	0	0
MSN	0.687026	0.726	0.235	0	0
CD47	0.685664	0.837	0.639	0	0
PLA2G1B	0.683134	0.433	0.059	0	0
ITGB6	0.677526	0.612	0.15	0	0
HSD17B6	0.677138	0.562	0.114	0	0
CD151	0.677058	0.797	0.503	0	0
IFI6	0.676797	0.71	0.513	0	0
LRRK2	0.67546	0.43	0.083	0	0
CTSD	0.673475	0.91	0.86	0	0
IRX2	0.672334	0.804	0.559	0	0
LMNA	0.671964	0.912	0.774	0	0
DUSP1	0.671964	0.95	0.852	0	0
TMPRSS2	0.670257	0.743	0.36	0	0
FLNA	0.667269	0.72	0.261	0	0
LGALS3BP	0.663859	0.845	0.696	0	0
MBIP	0.654921	0.725	0.301	0	0
FTL	0.65441	0.991	0.99	0	0
FNIP2	0.653157	0.699	0.304	0	0
PON2	0.651914	0.739	0.411	0	0
TNFRSF12A	0.639968	0.641	0.427	0	0
PRSS8	0.639963	0.658	0.182	0	0
DPP4	0.639861	0.561	0.101	0	0
ST3GAL5	0.63846	0.663	0.208	0	0
SLC22A31	0.633196	0.588	0.084	0	0
TIMP1	0.632261	0.718	0.463	0	0
PTP4A1	0.632113	0.85	0.661	0	0
ISG15	0.632069	0.53	0.31	0	0
QSOX1	0.62868	0.742	0.441	0	0
IGFBP4	0.628619	0.655	0.256	0	0
SERPINH1	0.625504	0.641	0.24	0	0
AC023157.3	0.624681	0.48	0.163	0	0
QPRT	0.623688	0.53	0.028	0	0
ITPR3	0.621565	0.622	0.163	0	0
RASD1	0.61761	0.6	0.288	0	0
MACF1	0.614079	0.835	0.616	0	0
HLA-DQB1	0.613854	0.737	0.497	0	0
TXNDC17	0.612244	0.669	0.468	0	0
HSPA1A	0.609202	0.919	0.885	0	0
SCTR	0.606107	0.486	0.034	0	0
TPM1	0.603971	0.756	0.558	0	0
MAFB	0.601627	0.587	0.328	0	0
RAB27A	0.596766	0.654	0.265	0	0
HSPB1	0.596278	0.922	0.829	0	0
HPGD	0.593409	0.364	0.048	0	0
CLPTM1L	0.592113	0.698	0.416	0	0
EGFR	0.589093	0.665	0.345	0	0
HHLA2	0.584871	0.487	0.257	0	0
KRT7	0.583945	0.85	0.558	0	0
AGRN	0.582492	0.68	0.354	0	0
TUBA1C	0.582456	0.753	0.446	0	0
IFITM3	0.581894	0.835	0.695	0	0
C16orf89	0.581118	0.687	0.467	0	0
EGR1	0.579538	0.82	0.621	0	0
LGALS4	0.579048	0.306	0.081	0	0
CAPN8	0.578602	0.594	0.198	0	0
PARM1	0.578239	0.54	0.073	0	0
SEMA4A	0.574301	0.585	0.215	0	0
S100A13	0.5742	0.788	0.644	0	0
TXN	0.570179	0.894	0.864	0	0
PTPRE	0.569825	0.593	0.171	0	0
RPL8	0.568881	0.967	0.947	0	0
MEGF9	0.568552	0.586	0.175	0	0
P4HB	0.562985	0.83	0.708	0	0
CD55	0.562245	0.934	0.811	0	0
PTP4A2	0.561832	0.823	0.663	0	0
RPL30	0.561665	0.968	0.948	0	0
C1orf116	0.556931	0.658	0.341	0	0
HLA-DPB1	0.556106	0.649	0.535	3.28e-273	8.72e-269
ZFP36L1	0.55584	0.931	0.861	0	0
ANKRD36C	0.553333	0.442	0.329	4.67e-136	1.24e-131
RNF145	0.552867	0.769	0.56	0	0
GPR160	0.551874	0.603	0.233	0	0
ZBTB20	0.550694	0.755	0.586	0	0
MFHAS1	0.550193	0.594	0.184	0	0
LGMN	0.548881	0.665	0.299	0	0
SDC4	0.548823	0.871	0.789	0	0
PARP14	0.547401	0.754	0.479	0	0
OCIAD2	0.545012	0.72	0.534	0	0
HLA-DMA	0.544988	0.686	0.515	0	0
PHLDA3	0.544216	0.612	0.196	0	0
NFKBIA	0.54287	0.868	0.709	0	0
CXCL2	0.54266	0.645	0.356	0	0
EPS8	0.542636	0.745	0.551	0	0
NDRG1	0.540855	0.607	0.227	0	0
MYO1B	0.539859	0.707	0.366	0	0
IL32	0.539314	0.534	0.184	0	0
YWHAZ	0.538118	0.888	0.797	0	0
GRN	0.537233	0.714	0.416	0	0
SPAG9	0.536328	0.753	0.487	0	0
C5orf38	0.535641	0.589	0.24	0	0
MX1	0.534769	0.521	0.215	0	0
SYNGR2	0.53315	0.716	0.402	0	0
DAPK1	0.532892	0.603	0.232	0	0
PTK7	0.532841	0.612	0.199	0	0
CD74	0.532147	0.939	0.908	4.04e-296	1.07e-291
FOXQ1	0.529247	0.542	0.185	0	0
SCGB3A2	0.528736	0.72	0.417	0	0
TXNIP	0.528698	0.788	0.584	0	0
ATF3	0.528451	0.866	0.745	0	0
BTG3	0.528431	0.744	0.468	0	0
RPS6KA3	0.528166	0.699	0.384	0	0
SNX30	0.526859	0.507	0.113	0	0
ERGIC1	0.524702	0.696	0.379	0	0
S100A6	0.523983	0.991	0.985	0	0
WSB1	0.522567	0.898	0.797	0	0
HEXIM1	0.518464	0.782	0.606	0	0
S100A16	0.517257	0.609	0.275	0	0
FAM3B	0.516428	0.498	0.163	0	0
BCAT1	0.51594	0.352	0.028	0	0
RNF213	0.511795	0.704	0.421	0	0
CAP1	0.511382	0.73	0.503	0	0
VAMP5	0.511125	0.446	0.266	0	0
BCAM	0.508848	0.714	0.378	0	0
TXNDC11	0.508756	0.647	0.267	0	0
MAOA	0.508337	0.57	0.305	0	0
SERINC2	0.506679	0.61	0.368	0	0
EIF3H	0.503612	0.714	0.52	0	0
RAP1GAP	0.502525	0.507	0.094	0	0
CD63	0.498597	0.934	0.911	0	0
HLA-DPA1	0.49735	0.761	0.673	1.18e-276	3.15e-272
MLPH	0.49644	0.712	0.485	0	0
NABP1	0.496015	0.582	0.291	0	0
KCNJ15	0.495683	0.336	0.082	0	0
SFTA1P	0.495584	0.536	0.233	0	0
PTK2	0.494768	0.699	0.401	0	0
PPIA	0.493913	0.898	0.857	0	0
DGAT1	0.492614	0.563	0.164	0	0
MAF1	0.492397	0.65	0.358	0	0
SVIL	0.490871	0.614	0.292	0	0
GALNT10	0.490668	0.502	0.085	0	0
AQP3	0.489848	0.783	0.72	1.52e-272	4.04e-268
IQGAP1	0.487697	0.823	0.683	0	0
ADAMTS1	0.486318	0.337	0.039	0	0
RGS16	0.484905	0.495	0.177	0	0
C6orf62	0.482883	0.778	0.578	0	0
IFI44L	0.481511	0.362	0.089	0	0
FUCA1	0.480881	0.617	0.365	0	0
GALE	0.479882	0.56	0.219	0	0
NCOA7	0.479557	0.848	0.688	0	0
RAD21	0.479177	0.662	0.492	0	0
TMED9	0.478471	0.735	0.539	0	0
ARHGDIB	0.47798	0.648	0.276	0	0
DAB2	0.477757	0.426	0.063	0	0
PIK3R3	0.477315	0.567	0.373	0	0
ECHDC1	0.476446	0.685	0.433	0	0
MACROD2	0.476107	0.414	0.156	0	0
IER3	0.474066	0.755	0.588	0	0
CTSB	0.473657	0.754	0.621	0	0
PAPSS2	0.473355	0.482	0.127	0	0
RPS6KA2	0.473179	0.568	0.169	0	0
TNFSF15	0.470499	0.415	0.092	0	0
ARRDC3	0.469912	0.687	0.45	0	0
SNX25	0.467002	0.517	0.159	0	0
ATP13A4	0.466721	0.584	0.212	0	0
RRM2B	0.466207	0.57	0.302	0	0
LACTB2	0.465648	0.54	0.221	0	0
ROS1	0.4641	0.412	0.05	0	0
HLA-DRB1	0.463755	0.861	0.838	1.6e-194	4.25e-190
VKORC1L1	0.462202	0.576	0.263	0	0
PLD3	0.46141	0.687	0.469	0	0
RHOBTB2	0.460858	0.502	0.11	0	0
SURF4	0.458489	0.644	0.361	0	0
RBM3	0.457825	0.757	0.57	0	0
ERBB3	0.45623	0.735	0.514	0	0
FAM49B	0.455553	0.615	0.26	0	0
NAPRT	0.454426	0.554	0.246	0	0
VEZT	0.453756	0.633	0.323	0	0
ARIH1	0.453519	0.701	0.568	0	0
MX2	0.451008	0.375	0.087	0	0
CYP1B1	0.450502	0.256	0.102	3.05e-278	8.1e-274
PMEPA1	0.449969	0.507	0.176	0	0
RBPMS	0.449928	0.656	0.4	0	0
PRKCZ	0.449112	0.627	0.308	0	0
HBEGF	0.447868	0.569	0.326	0	0
TUBB	0.447343	0.677	0.392	0	0
PPP1R14B	0.447248	0.644	0.345	0	0
TMEM125	0.446737	0.723	0.503	0	0
SERINC5	0.446415	0.58	0.251	0	0
RAI14	0.445475	0.574	0.296	0	0
ATP6V0E1	0.444529	0.818	0.768	0	0
EIF3E	0.444367	0.806	0.714	0	0
EPCAM	0.4442	0.865	0.806	0	0
CDH1	0.44359	0.748	0.609	0	0
GGCX	0.443008	0.565	0.22	0	0
TRNAU1AP	0.4429	0.623	0.377	0	0
ERBIN	0.441337	0.685	0.479	0	0
NR0B2	0.441025	0.344	0.035	0	0
CLIC5	0.440857	0.492	0.183	0	0
CLIC2	0.439475	0.466	0.06	0	0
ATP1A1	0.438854	0.894	0.82	0	0
IYD	0.438481	0.37	0.053	0	0
AHR	0.438095	0.721	0.517	0	0
MDM2	0.437309	0.61	0.445	0	0
RNF19A	0.434982	0.714	0.497	0	0
NR4A1	0.434606	0.845	0.687	0	0
MTDH	0.433283	0.818	0.736	0	0
CCND3	0.431303	0.629	0.316	0	0
KCNQ1OT1	0.430576	0.733	0.63	2.25e-168	5.98e-164
ZNF322	0.430399	0.44	0.211	0	0
TGFBR2	0.429502	0.647	0.343	0	0
PLK3	0.427626	0.608	0.353	0	0
COX6C	0.426709	0.877	0.854	0	0
COL1A1	0.426529	0.363	0.108	0	0
NRP1	0.426384	0.345	0.059	0	0
HP1BP3	0.426115	0.723	0.466	0	0
ALPL	0.425853	0.37	0.147	0	0
COL4A4	0.424989	0.534	0.079	0	0
SUMO3	0.424501	0.619	0.33	0	0
CERS2	0.424168	0.678	0.427	0	0
CCNL2	0.423742	0.631	0.36	0	0
KIAA0319L	0.423409	0.676	0.434	0	0
HOXD1	0.422401	0.414	0.042	0	0
LTA4H	0.422113	0.615	0.331	0	0
EFR3A	0.421308	0.605	0.292	0	0
TFPI	0.420203	0.49	0.28	0	0
HLA-DQA1	0.419902	0.496	0.412	3.97e-103	1.06e-98
BEX3	0.419679	0.642	0.344	0	0
STOM	0.419635	0.755	0.63	1.23e-307	3.26e-303
CRABP2	0.41919	0.377	0.101	0	0
TUBA4A	0.41848	0.584	0.27	0	0
FOXA2	0.417188	0.639	0.311	0	0
MMP15	0.417075	0.485	0.108	0	0
LYPLA1	0.416898	0.579	0.421	0	0
FAM129B	0.415182	0.656	0.385	0	0
SGK1	0.414257	0.569	0.347	0	0
GNPTAB	0.413452	0.58	0.253	0	0
MET	0.412608	0.618	0.357	0	0
C6orf48	0.411722	0.686	0.528	0	0
MARCKSL1	0.411387	0.408	0.348	9.59e-56	2.55e-51
TMEM30A	0.410903	0.666	0.434	0	0
BMP2	0.408968	0.395	0.067	0	0
SLC22A3	0.408605	0.404	0.058	0	0
PUM1	0.408407	0.732	0.535	0	0
ACTB	0.408128	0.976	0.972	0	0
MRPL14	0.407913	0.729	0.585	0	0
RPL22	0.406633	0.928	0.91	0	0
NEU1	0.406238	0.633	0.392	0	0
HNRNPU	0.405817	0.897	0.821	0	0
ARSE	0.404713	0.366	0.021	0	0
ZNF385B	0.404507	0.345	0.053	0	0
GNB1	0.404503	0.726	0.579	0	0
EEA1	0.404313	0.525	0.322	0	0
CAMK1D	0.404141	0.6	0.379	0	0
SLC39A4	0.4024	0.583	0.278	0	0
RNF181	0.402199	0.654	0.46	0	0
FCHO2	0.401755	0.531	0.237	0	0
AHCYL2	0.400788	0.497	0.179	0	0
SMC4	0.400556	0.544	0.267	0	0
SRSF7	0.400522	0.846	0.76	0	0
OSMR	0.39929	0.494	0.168	0	0
NELL1	0.399266	0.36	0.009	0	0
RGS2	0.399227	0.464	0.16	0	0
ZDHHC9	0.398669	0.488	0.148	0	0
PHLDA2	0.396512	0.628	0.334	0	0
MCL1	0.395329	0.852	0.712	0	0
COL18A1	0.394908	0.422	0.079	0	0
SSR2	0.39416	0.745	0.638	0	0
CAMK2D	0.393951	0.672	0.462	0	0
PPCS	0.393865	0.639	0.425	0	0
IL6ST	0.393382	0.732	0.552	0	0
MDK	0.392889	0.599	0.45	8.95e-258	2.38e-253
TNFSF10	0.392194	0.68	0.548	2.81e-258	7.47e-254
IFNGR2	0.392064	0.578	0.298	0	0
EIF4E	0.391828	0.602	0.429	0	0
IFITM2	0.390565	0.641	0.328	0	0
CGNL1	0.39016	0.487	0.107	0	0
EML4	0.389713	0.588	0.342	0	0
MYH9	0.388701	0.669	0.452	0	0
STXBP1	0.386959	0.508	0.25	0	0
YAP1	0.38603	0.657	0.41	0	0
RAB5B	0.386011	0.564	0.306	0	0
NEDD9	0.385988	0.739	0.551	0	0
VEPH1	0.385781	0.498	0.161	0	0
PTPN1	0.385715	0.603	0.325	0	0
TPM3	0.383774	0.799	0.658	0	0
DGKD	0.383625	0.464	0.132	0	0
RAMP1	0.38156	0.529	0.328	0	0
EDEM1	0.381028	0.524	0.205	0	0
TENT5A	0.380188	0.697	0.533	0	0
WNK1	0.380156	0.772	0.626	0	0
UNC13B	0.379787	0.534	0.226	0	0
ZFAS1	0.379724	0.813	0.742	0	0
FAM83H	0.378704	0.539	0.197	0	0
PAM	0.377412	0.475	0.188	0	0
SFTPA1	0.377269	0.525	0.202	0	0
CFLAR	0.377169	0.812	0.705	0	0
KIF1B	0.376868	0.564	0.279	0	0
TACC1	0.376334	0.554	0.228	0	0
TSPAN4	0.374551	0.538	0.18	0	0
SLC5A3	0.373931	0.58	0.417	2.1e-265	5.57e-261
CANX	0.37387	0.826	0.755	0	0
ICAM4	0.373068	0.464	0.216	0	0
ATRX	0.372683	0.801	0.648	0	0
TCEA3	0.371707	0.575	0.322	0	0
FRMD4B	0.370652	0.474	0.191	0	0
ARID1A	0.370257	0.672	0.461	0	0
DHRS7	0.370182	0.607	0.4	0	0
CEBPD	0.36954	0.847	0.766	1.33e-294	3.55e-290
TMBIM1	0.369401	0.556	0.276	0	0
SRD5A3	0.369389	0.485	0.259	0	0
RPS20	0.368504	0.941	0.93	0	0
MTHFR	0.367891	0.528	0.223	0	0
GPAA1	0.367784	0.654	0.441	0	0
HAGLR	0.366554	0.415	0.038	0	0
HSPA1B	0.365317	0.863	0.774	4.55e-290	1.21e-285
SPINT1	0.365211	0.695	0.476	0	0
ARHGEF2	0.364769	0.499	0.169	0	0
MEF2C	0.363931	0.433	0.117	0	0
ARHGEF12	0.363738	0.665	0.427	0	0
NDUFB9	0.363484	0.73	0.64	0	0
PLXND1	0.363422	0.407	0.075	0	0
RPL37	0.362444	0.957	0.934	0	0
DRAIC	0.362208	0.345	0.176	1.56e-298	4.14e-294
CYB5A	0.362129	0.904	0.892	3.78e-159	1.01e-154
PLEC	0.361722	0.651	0.436	0	0
TAPBP	0.36165	0.726	0.551	0	0
RRBP1	0.361623	0.799	0.679	0	0
INTS6	0.361522	0.75	0.662	9.05e-187	2.41e-182
DPYSL2	0.361244	0.554	0.223	0	0
TCEA1	0.361094	0.712	0.607	0	0
KRT15	0.360626	0.384	0.157	0	0
ZSCAN31	0.35993	0.399	0.079	0	0
C1orf198	0.359875	0.523	0.178	0	0
P3H2	0.359628	0.421	0.055	0	0
GLO1	0.359612	0.669	0.481	0	0
ENY2	0.35941	0.747	0.617	0	0
RAB27B	0.359229	0.366	0.141	0	0
MAST4	0.358679	0.643	0.462	0	0
PELI1	0.358487	0.515	0.386	2.28e-214	6.06e-210
MTUS1	0.358438	0.694	0.502	0	0
TM9SF3	0.358005	0.665	0.544	5.35e-280	1.42e-275
PPM1N	0.357571	0.28	0.067	0	0
CENPL	0.357342	0.345	0.102	0	0
CDC42EP1	0.356608	0.444	0.125	0	0
SOD2	0.35641	0.683	0.547	3e-240	7.97e-236
ELF5	0.355783	0.273	0.078	0	0
ADAM9	0.355506	0.503	0.287	0	0
ERRFI1	0.355339	0.777	0.592	0	0
PPP2R5A	0.355198	0.597	0.313	0	0
CD46	0.355184	0.822	0.689	0	0
COL4A3	0.354989	0.473	0.07	0	0
TMEM163	0.35425	0.387	0.036	0	0
LGR4	0.352487	0.449	0.143	0	0
LAD1	0.351883	0.418	0.071	0	0
CYBRD1	0.35154	0.544	0.245	0	0
CDC42BPA	0.351488	0.568	0.369	0	0
EHD2	0.351452	0.472	0.091	0	0
NINJ1	0.35136	0.534	0.255	0	0
TCEAL9	0.350765	0.553	0.264	0	0
SLC25A44	0.350559	0.421	0.216	0	0
RAB31	0.350357	0.579	0.372	0	0
PATJ	0.350218	0.69	0.455	0	0
CDKL2	0.349884	0.492	0.205	0	0
LPIN2	0.349476	0.573	0.3	0	0
LASP1	0.349232	0.62	0.396	0	0
TMC6	0.348911	0.509	0.197	0	0
ZNF281	0.348855	0.544	0.317	0	0
SLC27A3	0.348667	0.407	0.144	0	0
SLC43A3	0.348421	0.467	0.138	0	0
PBXIP1	0.348227	0.525	0.251	0	0
CLTC	0.34815	0.757	0.605	0	0
FURIN	0.347697	0.448	0.122	0	0
MAGI3	0.347676	0.593	0.338	0	0
UPP1	0.347624	0.432	0.179	0	0
HAS3	0.347615	0.363	0.06	0	0
MS4A15	0.346728	0.354	0.061	0	0
SPG21	0.346194	0.567	0.316	0	0
FOS	0.345578	0.957	0.87	0	0
SRSF11	0.34424	0.835	0.737	0	0
CD83	0.343623	0.416	0.188	0	0
RFTN1	0.342946	0.396	0.08	0	0
GJA1	0.342034	0.314	0.072	0	0
MXRA8	0.340865	0.28	0.02	0	0
PDZK1IP1	0.340283	0.488	0.226	0	0
FGFR3	0.340262	0.426	0.138	0	0
USP13	0.339871	0.422	0.088	0	0
CHD2	0.339507	0.716	0.544	0	0
HLA-DRB5	0.33866	0.352	0.339	1.67e-18	4.44e-14
IL6R	0.338529	0.547	0.243	0	0
HOOK3	0.338049	0.561	0.359	0	0
RND1	0.337493	0.357	0.172	0	0
DGCR2	0.337396	0.508	0.185	0	0
PDS5A	0.336469	0.605	0.339	0	0
TSTA3	0.334516	0.546	0.326	0	0
SMPDL3B	0.334485	0.393	0.067	0	0
PUF60	0.33439	0.658	0.506	0	0
PEF1	0.334143	0.534	0.267	0	0
METAP2	0.333219	0.708	0.553	0	0
TAOK3	0.333022	0.532	0.222	0	0
KPNA6	0.332315	0.588	0.383	0	0
ORMDL3	0.33215	0.487	0.168	0	0
AKAP1	0.331985	0.546	0.266	0	0
SERINC1	0.331765	0.679	0.5	0	0
TMEM159	0.331488	0.526	0.252	0	0
KCNQ3	0.331451	0.334	0.025	0	0
DCAF12	0.331287	0.499	0.215	0	0
AMIGO2	0.330886	0.408	0.091	0	0
FAM120A	0.330781	0.745	0.606	0	0
VPS28	0.330482	0.784	0.721	0	0
SPRED1	0.328838	0.501	0.2	0	0
TSPAN5	0.328773	0.362	0.055	0	0
FNDC3B	0.328463	0.605	0.374	0	0
MACC1	0.328389	0.606	0.401	0	0
IGF2R	0.327922	0.525	0.259	0	0
TPD52	0.327612	0.534	0.284	0	0
TMEM245	0.327466	0.613	0.391	0	0
AGPAT2	0.327283	0.669	0.486	0	0
SDF4	0.3272	0.625	0.47	0	0
EFCAB14	0.326888	0.626	0.425	0	0
EPB41L5	0.32671	0.543	0.216	0	0
MICAL2	0.326611	0.428	0.128	0	0
POLR2L	0.326417	0.835	0.815	0	0
TGFBI	0.325935	0.35	0.055	0	0
TNRC18	0.325863	0.541	0.28	0	0
XIAP	0.325429	0.601	0.37	0	0
GLCCI1	0.325208	0.508	0.34	6.45e-271	1.71e-266
SLC39A8	0.324684	0.624	0.159	0	0
CKAP4	0.323906	0.509	0.242	0	0
SH3RF1	0.322471	0.637	0.411	0	0
AK2	0.322232	0.626	0.413	0	0
PGGHG	0.321977	0.317	0.103	0	0
ZBTB10	0.321444	0.595	0.429	9.98e-264	2.65e-259
PRKAB1	0.321344	0.454	0.15	0	0
CDC42	0.321276	0.867	0.825	0	0
CTSZ	0.321193	0.746	0.647	0	0
TACSTD2	0.320868	0.904	0.823	0	0
CTSE	0.319599	0.325	0.091	0	0
EIF4G2	0.319072	0.87	0.817	0	0
CCDC47	0.318811	0.687	0.536	0	0
MEGF6	0.31875	0.369	0.048	0	0
AQP4	0.318539	0.616	0.246	0	0
SEC31A	0.318124	0.722	0.559	0	0
KDELR2	0.317781	0.691	0.567	0	0
FAM173A	0.317767	0.5	0.23	0	0
STK39	0.316499	0.44	0.153	0	0
MPST	0.316425	0.569	0.331	0	0
RBBP4	0.316193	0.64	0.436	0	0
RPS18	0.316133	0.969	0.948	0	0
TOR1AIP2	0.316114	0.699	0.483	0	0
MROH6	0.315983	0.373	0.065	0	0
EPB41	0.315389	0.444	0.168	0	0
CRLF1	0.314922	0.334	0.111	0	0
BRAF	0.314875	0.568	0.345	0	0
PHC2	0.314614	0.527	0.254	0	0
CRYZ	0.314153	0.438	0.153	0	0
TOP1	0.314007	0.775	0.665	0	0
NT5E	0.313977	0.388	0.154	0	0
MMP7	0.312701	0.359	0.235	1.79e-117	4.74e-113
IRF2BP2	0.312697	0.798	0.685	0	0
IDS	0.312564	0.692	0.562	5.19e-247	1.38e-242
TMEM63B	0.312088	0.517	0.201	0	0
ARID4A	0.311768	0.57	0.337	0	0
TMEM87A	0.310121	0.73	0.563	0	0
PHF20L1	0.310083	0.592	0.39	0	0
MT-ND4	0.309156	0.959	0.921	1.29e-207	3.43e-203
SCARB2	0.308828	0.638	0.431	0	0
THOC2	0.308363	0.659	0.473	0	0
CRIP2	0.308353	0.62	0.54	2.74e-178	7.27e-174
EXPH5	0.30775	0.699	0.542	5.41e-305	1.44e-300
ENC1	0.307487	0.448	0.206	0	0
ASH1L	0.307119	0.726	0.554	0	0
PAG1	0.307079	0.359	0.077	0	0
GLRX3	0.306848	0.527	0.412	9.97e-181	2.65e-176
GPRC5C	0.30662	0.585	0.38	0	0
PDIA3	0.306613	0.81	0.765	1.24e-270	3.3e-266
PHLDA1	0.306309	0.39	0.145	0	0
TFCP2L1	0.305494	0.315	0.057	0	0
MYO9A	0.3041	0.594	0.359	0	0
ZYG11B	0.303308	0.485	0.19	0	0
MKLN1	0.303295	0.537	0.331	0	0
GPSM3	0.302901	0.405	0.135	0	0
LIPH	0.302431	0.638	0.443	0	0
DAP	0.302137	0.54	0.354	0	0
ELOA	0.301746	0.547	0.296	0	0
CNKSR3	0.301688	0.431	0.25	9.4e-276	2.5e-271
RDH10	0.30132	0.585	0.431	6.82e-229	1.81e-224
FAF2	0.301315	0.543	0.311	0	0
KIF16B	0.300842	0.42	0.136	0	0
IER5	0.300671	0.677	0.53	1.43e-279	3.81e-275
ELOVL1	0.30001	0.509	0.242	0	0
AFAP1-AS1	0.299909	0.324	0.011	0	0
CAPG	0.299906	0.529	0.277	0	0
PMF1	0.299883	0.555	0.318	0	0
CHP1	0.299876	0.619	0.434	0	0
ACSS2	0.299832	0.4	0.133	0	0
ADK	0.29956	0.526	0.289	0	0
CPB2	0.298586	0.274	0.033	0	0
RASEF	0.298562	0.549	0.372	9.4e-305	2.5e-300
AIDA	0.29854	0.524	0.263	0	0
HCFC1R1	0.298194	0.544	0.308	0	0
FCGR2A	0.298127	0.286	0.06	0	0
TMEM150A	0.298101	0.392	0.115	0	0
MAPK13	0.29808	0.464	0.174	0	0
BMP3	0.297901	0.404	0.182	0	0
AC004982.2	0.297671	0.414	0.163	0	0
HSPA5	0.29746	0.842	0.799	1.97e-271	5.23e-267
CAPN2	0.297207	0.811	0.735	0	0
ABCA3	0.296944	0.355	0.088	0	0
TANC2	0.296883	0.458	0.221	0	0
FN1	0.296694	0.348	0.189	4.79e-252	1.27e-247
RPS21	0.296349	0.908	0.888	2.38e-235	6.32e-231
PHPT1	0.295773	0.78	0.721	3.18e-259	8.44e-255
AL355312.4	0.295691	0.289	0.032	0	0
EIF3I	0.295666	0.639	0.538	3.89e-250	1.03e-245
LDHA	0.295259	0.743	0.572	0	0
RPL39	0.294367	0.948	0.938	1.14e-226	3.02e-222
AL034417.3	0.294219	0.351	0.126	0	0
ARC	0.293905	0.309	0.083	0	0
MT-ND1	0.293771	0.948	0.912	4.32e-115	1.15e-110
SCP2	0.293624	0.764	0.681	0	0
OAT	0.293186	0.642	0.48	1.47e-250	3.92e-246
RAB25	0.29296	0.667	0.551	0	0
BLVRA	0.29282	0.609	0.44	0	0
SSR3	0.292749	0.665	0.508	0	0
SLC4A2	0.292297	0.472	0.2	0	0
RHOB	0.291661	0.86	0.784	2.47e-285	6.57e-281
KRT8	0.291605	0.909	0.878	9.04e-209	2.4e-204
EFNA1	0.29156	0.748	0.596	4.38e-306	1.16e-301
TMEM167A	0.291541	0.565	0.382	0	0
STK3	0.291374	0.511	0.237	0	0
PRRC2C	0.291222	0.832	0.733	0	0
RAB34	0.290071	0.534	0.276	0	0
HLA-A	0.289199	0.921	0.903	8.4e-187	2.23e-182
PPT1	0.289033	0.546	0.303	0	0
SWAP70	0.288941	0.571	0.377	0	0
MIER1	0.288772	0.552	0.356	0	0
FILIP1L	0.288601	0.267	0.037	0	0
DPY19L1	0.288543	0.397	0.151	0	0
SLC52A2	0.288349	0.464	0.203	0	0
YTHDF2	0.288281	0.657	0.504	0	0
SPRY4	0.288252	0.342	0.056	0	0
NCOA2	0.287598	0.533	0.303	0	0
TRIM38	0.287298	0.473	0.226	0	0
GPRC5A	0.287082	0.837	0.521	0	0
FOSB	0.286627	0.895	0.771	1.81e-243	4.82e-239
LAMB2	0.286034	0.477	0.217	0	0
UBE2G2	0.285603	0.598	0.382	0	0
ANKRD44	0.285525	0.424	0.137	0	0
JMJD1C	0.285436	0.705	0.573	2.55e-242	6.78e-238
SDCBP	0.285391	0.732	0.656	9.1e-193	2.42e-188
HIP1	0.285206	0.438	0.157	0	0
AQP5	0.284948	0.443	0.294	3.49e-197	9.27e-193
PARP10	0.28478	0.474	0.214	0	0
RHOBTB3	0.284742	0.633	0.479	1.43e-274	3.81e-270
AFF4	0.284461	0.7	0.537	0	0
GORASP2	0.284386	0.499	0.24	0	0
RACK1	0.284295	0.915	0.894	0	0
FUS	0.283915	0.875	0.796	7.89e-288	2.1e-283
MGAT4B	0.283759	0.529	0.274	0	0
APH1A	0.283428	0.573	0.338	0	0
NUFIP2	0.283256	0.733	0.635	1.25e-188	3.32e-184
LMO3	0.282726	0.65	0.522	3.76e-223	9.98e-219
TIPARP	0.28254	0.664	0.553	4.45e-185	1.18e-180
CCPG1	0.282492	0.715	0.616	1.21e-247	3.21e-243
TSC22D3	0.282315	0.63	0.476	1.1e-262	2.93e-258
UTRN	0.282216	0.767	0.615	0	0
SEL1L3	0.281713	0.517	0.294	0	0
CCDC6	0.281638	0.534	0.316	0	0
USP48	0.281558	0.551	0.318	0	0
MPZL2	0.280772	0.562	0.351	0	0
MLLT1	0.280737	0.464	0.225	0	0
GGT5	0.279575	0.355	0.128	0	0
SEC61A1	0.279538	0.553	0.326	0	0
YARS	0.278806	0.462	0.195	0	0
SPRY1	0.278509	0.433	0.179	0	0
MAGT1	0.278405	0.491	0.242	0	0
COMT	0.27789	0.746	0.667	5.36e-281	1.42e-276
PSMB2	0.277832	0.669	0.554	2.57e-283	6.84e-279
LYPLA2	0.277366	0.592	0.385	0	0
FNBP1L	0.276978	0.578	0.363	0	0
PCMTD1	0.276724	0.588	0.489	1.08e-174	2.87e-170
XRCC6	0.276573	0.742	0.631	0	0
CENPX	0.276536	0.562	0.37	0	0
GUSB	0.276256	0.488	0.332	4.07e-255	1.08e-250
MYOF	0.275804	0.548	0.346	0	0
MAP2	0.27574	0.303	0.047	0	0
BSDC1	0.275371	0.491	0.262	0	0
DSG2	0.275148	0.49	0.262	0	0
WWP1	0.275008	0.461	0.232	0	0
ERAP2	0.27498	0.331	0.121	0	0
ATAD3C	0.274948	0.383	0.12	0	0
INPPL1	0.274844	0.448	0.182	0	0
LTBP3	0.274842	0.591	0.369	0	0
OSBPL9	0.274707	0.616	0.391	0	0
RASGRF1	0.274456	0.289	0.038	0	0
GUCY1A1	0.274136	0.337	0.064	0	0
FAM13A	0.273676	0.659	0.538	1.32e-199	3.52e-195
JUP	0.273672	0.631	0.456	0	0
CRTAP	0.273636	0.418	0.151	0	0
FTX	0.273479	0.47	0.256	0	0
CMPK1	0.273391	0.693	0.557	0	0
SLC16A4	0.273228	0.323	0.069	0	0
NFYC	0.272807	0.441	0.183	0	0
MVP	0.272778	0.68	0.54	0	0
ELF3	0.272703	0.934	0.892	1.52e-202	4.05e-198
UQCRH	0.272267	0.795	0.749	0	0
CAMTA1	0.27214	0.668	0.534	0	0
PJA2	0.271748	0.614	0.452	3.45e-289	9.17e-285
IPO7	0.271621	0.586	0.389	0	0
DVL1	0.271618	0.431	0.187	0	0
RAB2A	0.271584	0.737	0.704	1.18e-140	3.13e-136
TAPT1	0.271484	0.516	0.272	0	0
SZRD1	0.271416	0.514	0.308	0	0
PTTG1IP	0.271337	0.741	0.636	0	0
PON3	0.271198	0.402	0.135	0	0
COX14	0.271055	0.711	0.63	5.53e-268	1.47e-263
WWC3	0.271047	0.501	0.25	0	0
FXYD5	0.27077	0.428	0.139	0	0
SESN3	0.270745	0.374	0.162	0	0
CREB3L1	0.270686	0.314	0.164	5.02e-245	1.33e-240
MGLL	0.270491	0.73	0.529	0	0
BHLHE40	0.269969	0.587	0.451	5.2e-200	1.38e-195
NFKBIZ	0.269716	0.719	0.594	4.43e-208	1.18e-203
ATP6V0A1	0.269544	0.406	0.143	0	0
CCND1	0.269473	0.705	0.589	2.24e-219	5.94e-215
ADI1	0.269317	0.625	0.467	0	0
TMEM50A	0.269172	0.746	0.666	0	0
SLC50A1	0.269158	0.484	0.25	0	0
C8orf82	0.269018	0.421	0.147	0	0
VMP1	0.268411	0.822	0.728	9.01e-102	2.39e-97
CTSA	0.268245	0.515	0.331	0	0
DLL4	0.268205	0.272	0.028	0	0
PYGB	0.267124	0.436	0.147	0	0
MED13	0.266442	0.591	0.405	0	0
BEX2	0.265961	0.436	0.163	0	0
ABHD2	0.265843	0.757	0.659	1.93e-201	5.13e-197
UBE2W	0.265653	0.46	0.224	0	0
CCSER2	0.265397	0.512	0.299	0	0
SLC12A2	0.265355	0.498	0.301	0	0
SFTPA2	0.265141	0.517	0.214	0	0
HNRNPH1	0.264582	0.824	0.723	5.31e-232	1.41e-227
PPIB	0.264515	0.781	0.729	3.05e-230	8.1e-226
PRKCI	0.264509	0.586	0.387	0	0
FGD4	0.264348	0.414	0.191	0	0
RPS29	0.2642	0.936	0.923	0	0
HIF1A	0.264015	0.464	0.232	0	0
PACSIN2	0.264007	0.518	0.309	0	0
NRGN	0.263387	0.259	0.063	0	0
RBMS2	0.262674	0.442	0.186	0	0
AP001160.1	0.262307	0.251	0.06	0	0
IPO9	0.262033	0.446	0.185	0	0
YPEL3	0.261983	0.679	0.538	2.51e-297	6.68e-293
MFGE8	0.261941	0.327	0.068	0	0
GRINA	0.261871	0.599	0.412	0	0
RASSF7	0.261862	0.61	0.394	0	0
RCC1	0.261641	0.426	0.181	0	0
PLPP3	0.261314	0.372	0.12	0	0
CTDSP2	0.261157	0.561	0.342	0	0
GSPT1	0.261077	0.719	0.591	9.24e-288	2.45e-283
PTPN12	0.260921	0.533	0.317	0	0
PHKB	0.260859	0.522	0.294	0	0
CTNNBIP1	0.260722	0.474	0.218	0	0
RAPH1	0.260407	0.431	0.207	0	0
TMEM43	0.260403	0.451	0.175	0	0
CTTN	0.260122	0.677	0.526	0	0
CALCOCO2	0.259755	0.517	0.311	0	0
MROH1	0.259085	0.431	0.187	0	0
ETV1	0.258589	0.275	0.049	0	0
SIPA1	0.258542	0.378	0.101	0	0
SORBS1	0.258247	0.324	0.046	0	0
SHARPIN	0.258031	0.534	0.322	0	0
KIAA1522	0.257975	0.614	0.463	2.87e-260	7.64e-256
PDIA4	0.257971	0.597	0.51	8.66e-143	2.3e-138
CBX4	0.257858	0.569	0.405	1.58e-277	4.19e-273
NADK	0.257515	0.447	0.211	0	0
CDKN2A	0.257303	0.288	0.08	0	0
SELENOM	0.257056	0.639	0.506	3.43e-234	9.12e-230
ARF1	0.256873	0.824	0.78	0	0
ACTR2	0.256304	0.696	0.565	0	0
POLR2K	0.256072	0.645	0.529	6.78e-282	1.8e-277
CASP8	0.256001	0.444	0.201	0	0
KIF13A	0.255562	0.518	0.297	0	0
EIF4G1	0.254092	0.641	0.481	0	0
BRD2	0.254064	0.849	0.77	5.22e-232	1.39e-227
EPHA2	0.253738	0.604	0.471	2.7e-201	7.18e-197
SLC9A1	0.253215	0.374	0.133	0	0
CALR	0.253035	0.81	0.789	3.09e-161	8.21e-157
OXR1	0.252391	0.664	0.517	4.08e-238	1.08e-233
ADH5	0.252312	0.636	0.477	0	0
ABHD5	0.252289	0.618	0.501	1.9e-164	5.05e-160
PKM	0.252266	0.806	0.761	1.47e-231	3.91e-227
KCNK5	0.252223	0.344	0.095	0	0
BFAR	0.252186	0.497	0.256	0	0
FBXW11	0.252113	0.519	0.297	0	0
MYLIP	0.251331	0.654	0.503	1.58e-235	4.19e-231
SCD	0.251095	0.336	0.133	0	0
MESP1	0.250746	0.305	0.122	0	0
CNDP2	0.250717	0.61	0.505	2.38e-173	6.33e-169
CREB3L2	0.250582	0.482	0.259	0	0
TP53I11	0.250525	0.453	0.235	0	0
MT1E	0.250036	0.718	0.62	2.73e-200	7.26e-196
HMGN5	-0.250374	0.148	0.297	1.87e-252	4.96e-248
CEP97	-0.250776	0.135	0.306	0	0
PPP1R15A	-0.250828	0.773	0.829	5.3e-220	1.41e-215
PHTF1	-0.250863	0.17	0.326	1.07e-269	2.85e-265
TBCB	-0.251001	0.414	0.523	1.17e-152	3.12e-148
REC8	-0.251631	0.149	0.342	0	0
TP73	-0.252005	0.1	0.291	0	0
MSH3	-0.252119	0.247	0.366	1.16e-170	3.07e-166
GLT8D1	-0.252136	0.24	0.371	3.95e-202	1.05e-197
TECR	-0.252219	0.619	0.716	1.63e-192	4.34e-188
CCP110	-0.252403	0.462	0.534	4.36e-106	1.16e-101
HMGB1	-0.252558	0.867	0.904	6.81e-144	1.81e-139
IQGAP2	-0.252801	0.115	0.366	0	0
CES4A	-0.2529	0.137	0.276	4.57e-237	1.21e-232
ATXN7L3B	-0.253147	0.419	0.506	3.21e-127	8.54e-123
KTN1	-0.253199	0.823	0.837	9.31e-90	2.47e-85
EID1	-0.253344	0.743	0.807	6.96e-212	1.85e-207
AKAP6	-0.253419	0.062	0.257	0	0
BBIP1	-0.254202	0.304	0.428	4.72e-188	1.25e-183
CCDC157	-0.25454	0.084	0.289	0	0
EHF	-0.255016	0.518	0.623	1.56e-206	4.15e-202
C1QBP	-0.255368	0.461	0.596	6.07e-220	1.61e-215
PLEKHG7	-0.255448	0.051	0.259	0	0
UNC93B1	-0.255552	0.604	0.633	5.46e-67	1.45e-62
ENKD1	-0.256294	0.218	0.366	9.04e-239	2.4e-234
ZBED5-AS1	-0.256313	0.225	0.373	2.72e-236	7.23e-232
PAX9	-0.256337	0.021	0.252	0	0
TTC32	-0.256721	0.129	0.331	0	0
ATP5MF	-0.257041	0.662	0.762	5.41e-192	1.44e-187
MORF4L2	-0.257197	0.719	0.744	1.12e-106	2.97e-102
SERP1	-0.257776	0.836	0.871	4.84e-196	1.28e-191
EFHD2	-0.258043	0.371	0.471	2.08e-132	5.52e-128
IRF1	-0.258238	0.586	0.664	2.42e-112	6.43e-108
SQLE	-0.258435	0.469	0.566	1.38e-122	3.66e-118
PPP1R7	-0.25871	0.463	0.541	3.08e-107	8.19e-103
RPL13A	-0.258746	0.928	0.958	0	0
ID1	-0.259024	0.7	0.719	1.61e-33	4.28e-29
POMP	-0.259079	0.613	0.726	2.08e-222	5.53e-218
GADD45GIP1	-0.259328	0.578	0.644	1.35e-126	3.58e-122
SEM1	-0.260704	0.704	0.782	2.25e-166	5.97e-162
C2orf81	-0.260896	0.06	0.26	0	0
TRIR	-0.261353	0.651	0.74	7.9e-226	2.1e-221
LRP11	-0.261361	0.331	0.447	1.02e-174	2.7e-170
FDXR	-0.26152	0.218	0.346	1.86e-201	4.95e-197
BLOC1S1	-0.262973	0.572	0.667	3.86e-166	1.03e-161
EFCAB12	-0.263244	0.041	0.257	0	0
RHPN2	-0.263402	0.149	0.361	0	0
MAP1LC3A	-0.263419	0.36	0.485	2.3e-177	6.12e-173
DPP7	-0.263441	0.51	0.625	3.44e-179	9.14e-175
PTRH1	-0.263759	0.266	0.396	5.13e-200	1.36e-195
CYB5D1	-0.263886	0.207	0.395	0	0
SMDT1	-0.264025	0.661	0.745	5.18e-193	1.38e-188
WDR19	-0.264321	0.139	0.326	0	0
ARL13B	-0.264365	0.271	0.409	2.27e-212	6.02e-208
TUBGCP2	-0.264533	0.356	0.475	1.94e-193	5.15e-189
COPS6	-0.264677	0.409	0.544	5.63e-225	1.5e-220
NRAV	-0.264707	0.09	0.281	0	0
CCDC24	-0.265703	0.179	0.337	5.26e-280	1.4e-275
BANF1	-0.265859	0.653	0.709	4.27e-111	1.14e-106
FAM3C	-0.266001	0.336	0.505	1.08e-281	2.86e-277
SERPINB1	-0.266054	0.651	0.707	4.77e-119	1.27e-114
CCDC66	-0.266178	0.294	0.432	7.16e-209	1.9e-204
CROCC	-0.266255	0.155	0.311	2.27e-280	6.04e-276
CHCHD6	-0.266831	0.155	0.339	0	0
NDUFA5	-0.26691	0.505	0.63	1.36e-232	3.61e-228
SEC14L1	-0.268506	0.286	0.47	0	0
TBCA	-0.268517	0.738	0.786	8e-127	2.13e-122
NSUN7	-0.269674	0.133	0.318	0	0
PGRMC1	-0.269964	0.689	0.72	6.73e-80	1.79e-75
DNAJB4	-0.270286	0.152	0.364	0	0
ALMS1	-0.270773	0.135	0.329	0	0
IQCE	-0.271134	0.198	0.346	1.33e-250	3.54e-246
NAT1	-0.271181	0.065	0.268	0	0
CYR61	-0.271297	0.66	0.705	9.95e-101	2.64e-96
SYTL3	-0.271404	0.176	0.344	8.12e-296	2.16e-291
PTGER4	-0.271579	0.051	0.28	0	0
HSPA8	-0.271779	0.87	0.897	1.35e-184	3.58e-180
VDAC2	-0.27192	0.508	0.652	6.02e-282	1.6e-277
CPLANE1	-0.272192	0.362	0.477	3.95e-160	1.05e-155
PCYT2	-0.272321	0.205	0.365	9.63e-287	2.56e-282
BDH1	-0.272525	0.117	0.251	4.64e-240	1.23e-235
CARS	-0.272655	0.348	0.423	1.46e-98	3.88e-94
NARS	-0.272787	0.384	0.526	4.27e-231	1.13e-226
PDCD4	-0.273038	0.298	0.516	0	0
MORN1	-0.274287	0.09	0.296	0	0
HS3ST1	-0.274791	0.142	0.359	0	0
LPAR3	-0.274836	0.012	0.261	0	0
TNFAIP3	-0.275154	0.338	0.479	2.56e-195	6.81e-191
RETREG1	-0.275513	0.136	0.304	1.66e-304	4.41e-300
SPATA6	-0.275551	0.357	0.446	4.5e-136	1.19e-131
PRDX6	-0.276079	0.743	0.806	1.47e-201	3.92e-197
CEP83	-0.276231	0.255	0.399	1.59e-227	4.22e-223
ZSCAN18	-0.276316	0.223	0.421	0	0
JOSD2	-0.276467	0.32	0.446	4.11e-187	1.09e-182
UCKL1-AS1	-0.277007	0.048	0.256	0	0
SAP30	-0.277075	0.07	0.316	0	0
PRKAR1A	-0.277376	0.78	0.815	5.92e-152	1.57e-147
INHBB	-0.277659	0.225	0.382	3.58e-245	9.5e-241
CDC14A	-0.277722	0.1	0.313	0	0
GAS8	-0.278412	0.179	0.346	3.59e-304	9.53e-300
ANAPC5	-0.278817	0.423	0.544	5.06e-207	1.34e-202
FILIP1	-0.278902	0.205	0.402	1.92e-306	5.11e-302
ANKRD42	-0.279015	0.172	0.355	0	0
NDUFAB1	-0.279243	0.638	0.704	2.15e-147	5.72e-143
ITGB8	-0.279633	0.189	0.419	0	0
CD81	-0.279861	0.824	0.868	1.41e-227	3.75e-223
FAM107B	-0.280265	0.624	0.698	1.27e-164	3.39e-160
CIR1	-0.280492	0.597	0.64	1.41e-107	3.74e-103
USP2	-0.280805	0.109	0.307	0	0
MAP1B	-0.282092	0.162	0.345	9.54e-305	2.53e-300
DMD	-0.282612	0.114	0.329	0	0
STIM2	-0.28323	0.295	0.479	0	0
ZNF688	-0.283234	0.228	0.37	1.8e-235	4.78e-231
TTC21A	-0.283321	0.065	0.286	0	0
MYL12B	-0.283334	0.838	0.905	6.78e-302	1.8e-297
KPNA3	-0.283733	0.25	0.428	0	0
TTLL9	-0.283767	0.03	0.252	0	0
MDM1	-0.283821	0.079	0.29	0	0
TTC39C	-0.286226	0.108	0.326	0	0
ANKRD26	-0.286359	0.273	0.407	1.11e-209	2.94e-205
UXT	-0.286414	0.538	0.667	6.35e-264	1.69e-259
ANKMY1	-0.286936	0.103	0.314	0	0
KNDC1	-0.287297	0.035	0.267	0	0
CBY1	-0.287667	0.302	0.416	5.39e-182	1.43e-177
BMPR1B	-0.287837	0.028	0.327	0	0
GABPB1-AS1	-0.288639	0.284	0.461	1.4e-275	3.73e-271
FBXO36	-0.28892	0.081	0.293	0	0
GABARAPL2	-0.288961	0.631	0.723	3.65e-202	9.7e-198
ZDHHC1	-0.289518	0.234	0.348	4.89e-176	1.3e-171
JUNB	-0.289623	0.889	0.875	1.76e-113	4.67e-109
SNX7	-0.289834	0.11	0.341	0	0
ULK4	-0.289918	0.089	0.306	0	0
PER2	-0.290512	0.359	0.518	1.95e-273	5.19e-269
EFEMP1	-0.290794	0.401	0.561	2.43e-218	6.45e-214
MB	-0.291325	0.018	0.27	0	0
AL022068.1	-0.291561	0.044	0.273	0	0
PDE4DIP	-0.291825	0.448	0.532	1.29e-142	3.43e-138
APOO	-0.292882	0.166	0.355	0	0
KIF27	-0.292901	0.161	0.346	0	0
C5orf15	-0.293129	0.407	0.513	4.53e-180	1.2e-175
DMAC1	-0.293492	0.313	0.483	7.17e-297	1.91e-292
DUSP18	-0.293994	0.166	0.347	0	0
RPL5	-0.294276	0.872	0.915	0	0
DRC7	-0.294485	0.04	0.267	0	0
SLC9A3R1	-0.295006	0.28	0.468	0	0
ACADM	-0.295058	0.384	0.486	4.96e-157	1.32e-152
ALS2CR12	-0.295954	0.03	0.26	0	0
RNF130	-0.296327	0.473	0.573	7.09e-174	1.88e-169
MRPL43	-0.296412	0.476	0.594	3.72e-209	9.87e-205
GAS2L2	-0.29663	0.03	0.273	0	0
TTC26	-0.296688	0.108	0.313	0	0
SH3BGRL	-0.296869	0.525	0.629	2.4e-203	6.38e-199
ARL4A	-0.297381	0.44	0.582	9.79e-237	2.6e-232
CASC2	-0.297658	0.072	0.287	0	0
AGBL2	-0.297876	0.047	0.274	0	0
SCAND1	-0.298668	0.602	0.702	6.28e-223	1.67e-218
DDIT4	-0.298857	0.395	0.477	1.57e-100	4.18e-96
EMP1	-0.299082	0.323	0.336	1.67e-28	4.43e-24
NUDT14	-0.299131	0.437	0.555	5.69e-207	1.51e-202
TJP3	-0.299657	0.273	0.439	1.29e-303	3.43e-299
TSNAXIP1	-0.299817	0.025	0.275	0	0
LMO4	-0.300459	0.485	0.595	3.03e-204	8.05e-200
LINC02166	-0.300724	0.024	0.256	0	0
ANAPC16	-0.300803	0.661	0.764	3.79e-273	1.01e-268
CFAP206	-0.301354	0.024	0.274	0	0
C9orf72	-0.301362	0.126	0.349	0	0
H2AFZ	-0.3023	0.7	0.755	8.48e-180	2.25e-175
TMF1	-0.302389	0.539	0.643	9.58e-204	2.55e-199
RPGRIP1L	-0.302984	0.118	0.315	0	0
CIRBP	-0.303362	0.785	0.86	1.46e-285	3.87e-281
RCAN3	-0.303563	0.358	0.487	3.2e-216	8.5e-212
DCTN3	-0.3036	0.425	0.569	1.33e-265	3.54e-261
SMYD2	-0.303606	0.251	0.407	4.44e-286	1.18e-281
BCAS3	-0.304571	0.103	0.307	0	0
STX2	-0.305283	0.189	0.357	3.98e-306	1.06e-301
RBKS	-0.30531	0.1	0.311	0	0
WDR93	-0.305983	0.031	0.269	0	0
TMEM154	-0.306021	0.143	0.335	0	0
C16orf71	-0.306806	0.033	0.279	0	0
WDR66	-0.306894	0.357	0.448	8.72e-135	2.32e-130
LAMTOR4	-0.307115	0.625	0.731	1.2e-236	3.18e-232
CLDN8	-0.307153	0.013	0.261	0	0
ECI2	-0.307272	0.387	0.48	1.55e-138	4.11e-134
GBP1	-0.307693	0.106	0.296	0	0
UPF3A	-0.308449	0.37	0.517	1.68e-254	4.46e-250
TUFM	-0.308635	0.652	0.734	5.43e-215	1.44e-210
CCDC88C	-0.308783	0.381	0.509	3.79e-224	1.01e-219
LRRC61	-0.309631	0.135	0.315	0	0
UQCR11	-0.309891	0.71	0.789	3.76e-238	1e-233
C4orf3	-0.310471	0.66	0.748	9.37e-215	2.49e-210
COX6B1	-0.310716	0.748	0.83	9.81e-292	2.61e-287
CHST6	-0.310742	0.03	0.265	0	0
ATP5F1A	-0.311328	0.578	0.701	4.94e-295	1.31e-290
ORAI2	-0.311721	0.159	0.357	0	0
IFT81	-0.31243	0.299	0.441	6.97e-245	1.85e-240
RPP38	-0.312497	0.211	0.381	0	0
WDR13	-0.313267	0.445	0.545	9.63e-193	2.56e-188
CFH	-0.313465	0.158	0.411	0	0
UBL5	-0.314446	0.799	0.865	1.21e-251	3.21e-247
MYB	-0.314498	0.032	0.283	0	0
MEIS2	-0.314686	0.176	0.371	0	0
SPCS1	-0.3149	0.693	0.782	1.17e-288	3.11e-284
NDUFB7	-0.314906	0.657	0.761	1.02e-288	2.71e-284
SYPL1	-0.31565	0.503	0.626	1.44e-231	3.82e-227
SAT2	-0.316451	0.352	0.538	0	0
STRBP	-0.316488	0.344	0.484	1.03e-244	2.73e-240
APOBEC4	-0.317292	0.019	0.265	0	0
RPL26	-0.317737	0.872	0.914	0	0
CCDC60	-0.318128	0.023	0.278	0	0
SLFN13	-0.31817	0.267	0.403	3.28e-223	8.71e-219
FAM104B	-0.318605	0.325	0.442	1.81e-201	4.8e-197
SUGT1	-0.318619	0.415	0.561	3.71e-280	9.87e-276
TSPAN8	-0.318868	0.127	0.27	3.6e-241	9.56e-237
RRAGA	-0.31917	0.357	0.517	2.69e-303	7.14e-299
BUD31	-0.320246	0.492	0.612	3.3e-239	8.78e-235
LRRC49	-0.32037	0.072	0.306	0	0
ATP6V1D	-0.320893	0.491	0.59	6.79e-203	1.8e-198
KIF6	-0.321761	0.036	0.278	0	0
LZTFL1	-0.322239	0.227	0.413	0	0
OCEL1	-0.32273	0.244	0.401	1.4e-276	3.72e-272
RIBC2	-0.322813	0.089	0.293	0	0
CCDC69	-0.323326	0.116	0.36	0	0
PRSS23	-0.323776	0.252	0.281	2.59e-32	6.89e-28
TNFRSF19	-0.324221	0.09	0.332	0	0
P4HA2	-0.324345	0.317	0.441	1.37e-219	3.65e-215
VPS35	-0.324598	0.535	0.635	1.37e-217	3.64e-213
SPAG7	-0.325737	0.418	0.566	4.54e-287	1.21e-282
NDUFA3	-0.326077	0.576	0.693	4.39e-263	1.17e-258
EIF3K	-0.326097	0.628	0.767	0	0
PERP	-0.326305	0.781	0.848	8.43e-301	2.24e-296
FOXC1	-0.326783	0.232	0.462	0	0
RABAC1	-0.327151	0.585	0.716	8.33e-256	2.21e-251
GSTK1	-0.327478	0.434	0.614	0	0
LRIG1	-0.327674	0.395	0.561	0	0
PLEKHB1	-0.327743	0.212	0.376	1.39e-304	3.7e-300
BCO2	-0.327813	0.094	0.321	0	0
SERTAD1	-0.327988	0.537	0.624	4.18e-224	1.11e-219
FSD1L	-0.328405	0.047	0.294	0	0
LCA5	-0.328928	0.287	0.441	3.71e-260	9.85e-256
ZNF428	-0.329014	0.4	0.552	4.18e-294	1.11e-289
RSPH14	-0.329656	0.034	0.28	0	0
S100A11	-0.329931	0.945	0.959	2.46e-169	6.55e-165
ARMC2	-0.330991	0.073	0.307	0	0
TOGARAM1	-0.331619	0.281	0.444	5.21e-299	1.39e-294
ATF7IP2	-0.331632	0.283	0.417	3.91e-223	1.04e-218
LRRC73	-0.331835	0.045	0.293	0	0
RPS7	-0.332322	0.887	0.929	0	0
HS3ST6	-0.332688	0.032	0.283	0	0
DRAM2	-0.333296	0.242	0.424	0	0
UBL3	-0.333521	0.577	0.684	4.73e-251	1.26e-246
FAM161A	-0.333585	0.177	0.372	0	0
TAX1BP1	-0.333841	0.794	0.827	2.57e-173	6.83e-169
NDUFV2	-0.334178	0.622	0.746	0	0
TMEM212	-0.33426	0.011	0.273	0	0
ERICH5	-0.33482	0.161	0.33	0	0
EIF1B	-0.335026	0.538	0.673	0	0
TCF4	-0.335483	0.034	0.339	0	0
TTLL7	-0.335701	0.06	0.28	0	0
LCA5L	-0.335993	0.106	0.321	0	0
CMTM6	-0.336626	0.498	0.635	2.45e-302	6.52e-298
NHLRC4	-0.336825	0.025	0.284	0	0
AL353770.4	-0.336879	0.014	0.253	0	0
PPOX	-0.337307	0.132	0.348	0	0
KIF2A	-0.338391	0.252	0.43	0	0
SRGAP1	-0.338979	0.103	0.37	0	0
TMEM123	-0.339233	0.633	0.75	0	0
TEKT4	-0.339261	0.035	0.289	0	0
CYP4X1	-0.339874	0.276	0.471	0	0
CFAP20	-0.339984	0.374	0.512	8.73e-262	2.32e-257
DZANK1	-0.340274	0.065	0.309	0	0
C10orf67	-0.340292	0.009	0.264	0	0
METTL27	-0.340436	0.156	0.324	0	0
CLTA	-0.340556	0.733	0.797	3.87e-240	1.03e-235
RABL2A	-0.340931	0.079	0.321	0	0
NEK1	-0.341125	0.186	0.383	0	0
LGALS3	-0.341687	0.899	0.922	9.78e-243	2.6e-238
MAFF	-0.342429	0.453	0.561	2.21e-239	5.88e-235
CCDC189	-0.343076	0.088	0.332	0	0
CFAP74	-0.343373	0.067	0.322	0	0
RFX2	-0.344335	0.333	0.494	0	0
CFAP36	-0.344707	0.473	0.564	1.02e-189	2.71e-185
TMEM14B	-0.34494	0.623	0.703	2.04e-209	5.43e-205
FABP4	-0.345117	0.059	0.297	0	0
PITX1	-0.345701	0.037	0.297	0	0
AKR1C1	-0.346604	0.18	0.383	0	0
WDR49	-0.347415	0.042	0.296	0	0
IFT46	-0.347516	0.17	0.377	0	0
AZIN1	-0.349662	0.55	0.611	2.57e-156	6.82e-152
MYCBP	-0.350002	0.208	0.393	0	0
VDAC3	-0.350274	0.417	0.564	4.4e-299	1.17e-294
BORCS7	-0.350364	0.419	0.575	0	0
SCCPDH	-0.350763	0.326	0.502	0	0
IFT57	-0.351621	0.755	0.762	2.87e-133	7.62e-129
CD9	-0.352016	0.839	0.894	0	0
PIN1	-0.353011	0.401	0.554	0	0
ZNF440	-0.353285	0.166	0.371	0	0
ANXA1	-0.353711	0.826	0.914	0	0
ZNF487	-0.353755	0.133	0.361	0	0
PRSS12	-0.355468	0.242	0.446	0	0
B2M	-0.355873	0.988	0.993	0	0
MIR22HG	-0.356692	0.305	0.508	0	0
FBXW9	-0.356871	0.099	0.34	0	0
CAPS2	-0.357094	0.048	0.308	0	0
RAB36	-0.360854	0.142	0.362	0	0
SEMA3C	-0.361457	0.098	0.372	0	0
KLHDC9	-0.361934	0.163	0.376	0	0
NDUFAF3	-0.362082	0.571	0.681	4.23e-277	1.12e-272
CDC16	-0.363213	0.262	0.441	0	0
SSB	-0.363233	0.652	0.727	7.17e-228	1.9e-223
WIPI1	-0.364247	0.127	0.398	0	0
FOXA1	-0.36456	0.394	0.582	0	0
NDUFB8	-0.364753	0.522	0.683	0	0
ANKRD37	-0.366126	0.505	0.617	7.28e-219	1.94e-214
NELFE	-0.366666	0.407	0.547	5.25e-289	1.39e-284
CFAP221	-0.366941	0.307	0.433	9.28e-237	2.47e-232
UCP2	-0.368047	0.405	0.547	1.8e-252	4.77e-248
CFDP1	-0.368195	0.419	0.578	0	0
SPINT2	-0.369647	0.794	0.871	0	0
MPDZ	-0.370593	0.108	0.353	0	0
AC013470.2	-0.372118	0.024	0.29	0	0
RPGR	-0.372308	0.26	0.435	0	0
MAP6	-0.372596	0.101	0.344	0	0
CXCL17	-0.372677	0.617	0.699	7.9e-198	2.1e-193
VWA3A	-0.372753	0.036	0.296	0	0
SPATA4	-0.373018	0.022	0.3	0	0
GCLM	-0.373714	0.251	0.486	0	0
DOC2A	-0.374588	0.044	0.287	0	0
SMPD2	-0.376674	0.139	0.374	0	0
FRMPD2	-0.377276	0.021	0.299	0	0
VSTM2L	-0.37793	0.307	0.481	0	0
ACYP1	-0.378755	0.149	0.401	0	0
EFHC2	-0.378833	0.133	0.366	0	0
FIS1	-0.379126	0.62	0.739	0	0
C2orf73	-0.380545	0.019	0.299	0	0
SERPINB6	-0.380734	0.592	0.696	2.06e-296	5.48e-292
KIAA2012	-0.382428	0.012	0.278	0	0
HNRNPF	-0.382801	0.681	0.768	0	0
MUC15	-0.383021	0.425	0.602	0	0
CAV1	-0.384721	0.401	0.2	1.46e-279	3.88e-275
DNAH2	-0.385567	0.118	0.35	0	0
MRPL57	-0.386921	0.5	0.662	0	0
MRPL40	-0.388115	0.503	0.628	4.82e-290	1.28e-285
B9D2	-0.388446	0.164	0.38	0	0
DENND6B	-0.388764	0.149	0.385	0	0
NANS	-0.389059	0.485	0.637	0	0
RSPH3	-0.389372	0.283	0.459	0	0
PLEKHA5	-0.389453	0.367	0.56	0	0
SERTAD4-AS1	-0.389597	0.22	0.449	0	0
RASSF9	-0.390046	0.094	0.413	0	0
TMEM67	-0.390073	0.177	0.409	0	0
RND3	-0.390491	0.467	0.617	1.35e-295	3.58e-291
KIF3A	-0.392032	0.342	0.495	0	0
PPP1R32	-0.392101	0.034	0.298	0	0
CCDC187	-0.392535	0.028	0.324	0	0
CCDC151	-0.393273	0.051	0.333	0	0
PTGES3	-0.393609	0.805	0.844	6.22e-226	1.65e-221
CCDC40	-0.393909	0.118	0.37	0	0
NME7	-0.394183	0.254	0.455	0	0
FAIM	-0.396015	0.297	0.47	0	0
INTU	-0.397074	0.2	0.406	0	0
C1orf158	-0.397268	0.073	0.353	0	0
CCDC190	-0.397416	0.013	0.281	0	0
CFAP65	-0.398187	0.067	0.352	0	0
ICA1L	-0.398813	0.081	0.36	0	0
CTNNAL1	-0.399147	0.157	0.431	0	0
SIX1	-0.40011	0.242	0.493	0	0
COLCA1	-0.400754	0.246	0.488	0	0
PGM2L1	-0.401513	0.318	0.541	0	0
COQ4	-0.40379	0.434	0.582	0	0
CCDC180	-0.404139	0.075	0.343	0	0
CATIP	-0.406394	0.079	0.352	0	0
GAPDH	-0.406752	0.752	0.825	0	0
VNN3	-0.407318	0.014	0.279	0	0
PAPSS1	-0.408027	0.414	0.595	0	0
CFAP69	-0.408442	0.058	0.339	0	0
DUSP4	-0.40905	0.175	0.457	0	0
PTPRT	-0.411633	0.017	0.293	0	0
B3GNT5	-0.411634	0.257	0.521	0	0
GRIN3B	-0.412155	0.026	0.336	0	0
GLIPR2	-0.412259	0.049	0.408	0	0
CFAP58	-0.412812	0.021	0.322	0	0
UACA	-0.412935	0.033	0.331	0	0
LINC01571	-0.413026	0.008	0.292	0	0
FBXO15	-0.413638	0.033	0.327	0	0
RPL21	-0.414019	0.908	0.951	0	0
C11orf16	-0.41501	0.135	0.386	0	0
C6	-0.41946	0.031	0.286	0	0
IGF2BP2	-0.419616	0.13	0.433	0	0
MORN3	-0.420307	0.09	0.357	0	0
KLF5	-0.420583	0.64	0.728	0	0
KIF19	-0.420983	0.026	0.343	0	0
KIAA1841	-0.421075	0.107	0.379	0	0
CYP4B1	-0.421972	0.777	0.859	1.46e-276	3.89e-272
PDK4	-0.422747	0.192	0.437	0	0
CEP290	-0.425071	0.344	0.505	0	0
DYNC2LI1	-0.426995	0.213	0.433	0	0
RPSA	-0.429821	0.86	0.911	0	0
NLRP1	-0.430143	0.147	0.389	0	0
CCNO	-0.431565	0.059	0.39	0	0
DLEC1	-0.43231	0.045	0.336	0	0
COMMD6	-0.432329	0.624	0.783	0	0
EPHX1	-0.433285	0.731	0.809	0	0
POU2AF1	-0.433833	0.014	0.344	0	0
CITED4	-0.434302	0.314	0.483	0	0
NAT14	-0.434867	0.272	0.435	0	0
SLITRK6	-0.435595	0.014	0.313	0	0
CD164	-0.436119	0.721	0.793	2.92e-272	7.75e-268
SPAG1	-0.436176	0.387	0.551	0	0
AC078864.2	-0.436605	0.064	0.332	0	0
MAPK10	-0.438701	0.278	0.484	0	0
CFAP57	-0.43927	0.184	0.409	0	0
TGM2	-0.439436	0.068	0.307	0	0
CC2D2A	-0.442184	0.235	0.443	0	0
YBX3	-0.443499	0.771	0.842	0	0
ZNF273	-0.443757	0.063	0.335	0	0
CFAP47	-0.444532	0.031	0.334	0	0
DNAH3	-0.445411	0.038	0.334	0	0
CLIC1	-0.445505	0.795	0.865	0	0
WFDC6	-0.446411	0.01	0.3	0	0
KCNRG	-0.446466	0.033	0.342	0	0
C10orf95	-0.447019	0.079	0.367	0	0
CFAP77	-0.447151	0.031	0.343	0	0
DNAJB13	-0.448479	0.058	0.352	0	0
LINC01513	-0.449295	0.031	0.34	0	0
MAPRE3	-0.449394	0.171	0.43	0	0
C19orf70	-0.449508	0.569	0.699	0	0
PFDN5	-0.449676	0.858	0.91	0	0
CABCOCO1	-0.451669	0.248	0.451	0	0
TEX9	-0.452992	0.152	0.405	0	0
CHMP2A	-0.457336	0.595	0.739	0	0
SAP18	-0.457897	0.71	0.835	0	0
EPPIN	-0.457899	0.01	0.3	0	0
CCDC34	-0.459061	0.119	0.387	0	0
PFN2	-0.460126	0.3	0.508	0	0
IL20RA	-0.460457	0.059	0.428	0	0
AHSA1	-0.46111	0.509	0.654	0	0
IQCK	-0.461542	0.189	0.443	0	0
UBXN10	-0.461573	0.269	0.457	0	0
LRRC4	-0.461993	0.039	0.414	0	0
DGKH	-0.462204	0.171	0.435	0	0
DPY30	-0.466186	0.582	0.671	3.39e-273	9e-269
HSBP1	-0.466228	0.768	0.827	1.24e-296	3.3e-292
ABCA5	-0.466396	0.243	0.488	0	0
LRRC34	-0.467052	0.032	0.35	0	0
DNAH11	-0.467116	0.26	0.465	0	0
DHRS9	-0.467382	0.009	0.294	0	0
DNAI2	-0.467591	0.022	0.354	0	0
GCLC	-0.469419	0.066	0.403	0	0
FUZ	-0.469788	0.1	0.4	0	0
HSPBP1	-0.470341	0.237	0.467	0	0
CTGF	-0.470673	0.538	0.658	8.08e-205	2.15e-200
HACD4	-0.471853	0.173	0.449	0	0
EFHB	-0.472556	0.053	0.358	0	0
DNAI1	-0.473219	0.031	0.359	0	0
MAP1A	-0.474347	0.151	0.413	0	0
CLMN	-0.475381	0.223	0.475	0	0
PPP1R14C	-0.475537	0.202	0.477	0	0
DNAL1	-0.476003	0.231	0.47	0	0
2020-03-10	-0.47607	0.031	0.366	0	0
DMKN	-0.476769	0.569	0.672	0	0
C4orf47	-0.47774	0.15	0.409	0	0
TSTD1	-0.479937	0.757	0.839	0	0
PRR15	-0.481317	0.013	0.38	0	0
DNAJA4	-0.481443	0.505	0.642	0	0
PTPRN2	-0.482727	0.18	0.434	0	0
FAM227A	-0.48354	0.186	0.409	0	0
PSIP1	-0.484893	0.272	0.544	0	0
PIH1D2	-0.486218	0.074	0.375	0	0
TSPAN6	-0.48652	0.382	0.585	0	0
STOX1	-0.488419	0.07	0.394	0	0
APPL2	-0.489354	0.182	0.454	0	0
CFAP100	-0.49016	0.047	0.379	0	0
ECT2L	-0.490987	0.022	0.347	0	0
DZIP1L	-0.492776	0.04	0.365	0	0
SEC14L3	-0.493237	0.023	0.297	0	0
HMGB2	-0.493544	0.29	0.517	0	0
TRIP13	-0.494271	0.032	0.314	0	0
CALM2	-0.498198	0.901	0.944	0	0
DALRD3	-0.499113	0.274	0.51	0	0
ERGIC3	-0.500539	0.616	0.728	0	0
CYBA	-0.501512	0.567	0.77	0	0
OSBPL6	-0.501746	0.119	0.401	0	0
IFT74	-0.502148	0.2	0.467	0	0
LINC02345	-0.502692	0.047	0.376	0	0
ITM2B	-0.502988	0.839	0.914	0	0
SCGB2A1	-0.503076	0.081	0.345	0	0
TUSC3	-0.503308	0.339	0.555	0	0
IQCA1	-0.504106	0.266	0.494	0	0
LINC01765	-0.505235	0.016	0.352	0	0
TP53TG1	-0.505264	0.204	0.475	0	0
NEK11	-0.506273	0.179	0.443	0	0
EFCAB2	-0.508546	0.195	0.445	0	0
LRRC71	-0.508895	0.017	0.369	0	0
WRB	-0.509492	0.34	0.509	0	0
MDH1B	-0.509966	0.041	0.382	0	0
LRWD1	-0.510854	0.111	0.413	0	0
CCDC114	-0.511633	0.068	0.386	0	0
IFT172	-0.514121	0.149	0.437	0	0
SLC7A2	-0.514664	0.125	0.464	0	0
YWHAE	-0.515209	0.753	0.851	0	0
CCDC96	-0.516165	0.126	0.388	0	0
IQCD	-0.517402	0.147	0.415	0	0
NBEA	-0.51849	0.094	0.45	0	0
CCDC191	-0.519499	0.188	0.446	0	0
C1orf87	-0.519632	0.026	0.371	0	0
LRRC6	-0.519903	0.202	0.447	0	0
DSP	-0.520178	0.254	0.574	0	0
DUSP14	-0.521147	0.23	0.536	0	0
FABP5	-0.521526	0.249	0.369	5.84e-145	1.55e-140
CFAP54	-0.522997	0.134	0.405	0	0
MAP3K19	-0.523747	0.099	0.413	0	0
AC004832.1	-0.524285	0.047	0.375	0	0
KIAA1211L	-0.526979	0.11	0.438	0	0
GPR162	-0.527249	0.029	0.381	0	0
DCDC1	-0.527981	0.024	0.367	0	0
HAGHL	-0.529443	0.065	0.401	0	0
ACBD3-AS1	-0.529764	0.032	0.368	0	0
CCDC74B	-0.529855	0.029	0.367	0	0
CCDC181	-0.530769	0.082	0.387	0	0
TTC25	-0.530952	0.111	0.411	0	0
CNTRL	-0.532538	0.212	0.481	0	0
SPATA33	-0.532688	0.14	0.442	0	0
ZC2HC1A	-0.532741	0.273	0.504	0	0
SPAG8	-0.533125	0.045	0.383	0	0
PCM1	-0.536903	0.623	0.738	0	0
ADGB	-0.53824	0.028	0.382	0	0
ANXA2	-0.538499	0.893	0.936	0	0
SMIM19	-0.539042	0.352	0.612	0	0
LDHB	-0.539315	0.619	0.784	0	0
ZKSCAN1	-0.54023	0.307	0.537	0	0
CFAP44	-0.54041	0.16	0.427	0	0
MAATS1	-0.543562	0.111	0.424	0	0
RIPOR2	-0.543564	0.086	0.417	0	0
AL121899.1	-0.543861	0.024	0.366	0	0
AK7	-0.544388	0.096	0.409	0	0
AGER	-0.544433	0.306	0.103	0	0
C7orf57	-0.544565	0.155	0.434	0	0
TTC29	-0.544778	0.027	0.38	0	0
TSC22D1	-0.545989	0.672	0.811	0	0
CENPM	-0.547811	0.034	0.38	0	0
SPACA9	-0.548675	0.193	0.449	0	0
NWD1	-0.548882	0.039	0.382	0	0
UBXN11	-0.550692	0.199	0.489	0	0
CCDC30	-0.551087	0.178	0.448	0	0
CASC1	-0.552075	0.091	0.405	0	0
FYB2	-0.552514	0.075	0.451	0	0
MUC4	-0.554351	0.214	0.535	0	0
PROM1	-0.557698	0.2	0.488	0	0
SRGAP3	-0.558207	0.097	0.47	0	0
WDR63	-0.559133	0.041	0.394	0	0
HIPK1	-0.559607	0.43	0.624	0	0
TCTEX1D1	-0.560119	0.026	0.384	0	0
IQUB	-0.5619	0.047	0.398	0	0
TOGARAM2	-0.565123	0.048	0.395	0	0
IRX3	-0.565481	0.425	0.657	0	0
FGF14	-0.565647	0.012	0.368	0	0
LBH	-0.566673	0.406	0.578	0	0
RIBC1	-0.56731	0.082	0.404	0	0
MAP9	-0.568651	0.327	0.551	0	0
TSGA10	-0.570923	0.147	0.464	0	0
AC244090.1	-0.572286	0.289	0.495	0	0
ARMC4	-0.572907	0.063	0.41	0	0
CDHR4	-0.573551	0.028	0.399	0	0
MAPK15	-0.575454	0.119	0.421	0	0
DAW1	-0.576169	0.04	0.388	0	0
SPATA17	-0.577181	0.14	0.439	0	0
DYNLT1	-0.578919	0.733	0.786	0	0
IGFBP7	-0.579864	0.553	0.682	0	0
FMO2	-0.580532	0.035	0.344	0	0
CTSS	-0.582731	0.603	0.714	0	0
C17orf97	-0.583631	0.102	0.424	0	0
MOK	-0.584066	0.272	0.514	0	0
GSTP1	-0.584633	0.94	0.973	0	0
HSP90AA1	-0.5866	0.976	0.987	0	0
RARRES1	-0.587832	0.014	0.299	0	0
TTLL10	-0.588786	0.125	0.439	0	0
PLEKHS1	-0.592307	0.221	0.568	0	0
PALMD	-0.593012	0.081	0.439	0	0
C11orf74	-0.593321	0.223	0.493	0	0
SAMHD1	-0.595605	0.157	0.544	0	0
CSPP1	-0.597966	0.325	0.548	0	0
FANK1	-0.602405	0.17	0.441	0	0
NPHP1	-0.603485	0.222	0.49	0	0
CFAP46	-0.604547	0.083	0.421	0	0
DNAH6	-0.605359	0.116	0.432	0	0
SCPEP1	-0.606905	0.456	0.677	0	0
C20orf96	-0.60805	0.138	0.438	0	0
RABL2B	-0.610084	0.142	0.464	0	0
CFAP45	-0.610593	0.173	0.459	0	0
AK9	-0.611074	0.206	0.483	0	0
DNPH1	-0.612196	0.505	0.641	0	0
DNALI1	-0.615535	0.512	0.596	0	0
ALDH3A1	-0.615701	0.099	0.338	0	0
IFT43	-0.616348	0.36	0.574	0	0
CDS1	-0.617551	0.485	0.611	0	0
PROS1	-0.619378	0.317	0.422	5.94e-219	1.58e-214
PIH1D3	-0.621262	0.023	0.398	0	0
LRTOMT	-0.624813	0.146	0.453	0	0
PLPP2	-0.62653	0.578	0.731	0	0
DNAAF3	-0.628767	0.053	0.416	0	0
SERPINF1	-0.630846	0.042	0.467	0	0
RPA3	-0.630996	0.425	0.622	0	0
CD164L2	-0.631289	0.119	0.424	0	0
CYSTM1	-0.631603	0.676	0.797	0	0
TMEM107	-0.632506	0.159	0.487	0	0
HMGN3	-0.632833	0.815	0.879	0	0
LXN	-0.636309	0.133	0.504	0	0
RUVBL1	-0.636895	0.314	0.535	0	0
ARL3	-0.638261	0.345	0.583	0	0
IFT88	-0.639747	0.137	0.478	0	0
RGS22	-0.641037	0.027	0.391	0	0
SARAF	-0.645238	0.729	0.852	0	0
HSPH1	-0.646278	0.659	0.801	0	0
TMEM232	-0.647484	0.054	0.428	0	0
CFAP299	-0.647909	0.027	0.407	0	0
CCDC65	-0.64864	0.033	0.416	0	0
CLUAP1	-0.648919	0.406	0.585	0	0
KLK11	-0.649201	0.155	0.305	0	0
PRR29	-0.65256	0.085	0.447	0	0
TMEM231	-0.656342	0.127	0.46	0	0
RFX3	-0.656396	0.194	0.505	0	0
PKIG	-0.657248	0.129	0.483	0	0
CKB	-0.657908	0.718	0.749	0	0
DCDC2B	-0.658077	0.045	0.423	0	0
MLF1	-0.658266	0.424	0.619	0	0
ANKUB1	-0.6597	0.015	0.394	0	0
UBAC1	-0.660201	0.223	0.534	0	0
FAM166B	-0.664193	0.041	0.427	0	0
PKIB	-0.665174	0.029	0.41	0	0
B9D1	-0.6669	0.128	0.463	0	0
SPEF1	-0.667565	0.073	0.447	0	0
LKAAEAR1	-0.673695	0.056	0.401	0	0
PPP1R42	-0.673921	0.029	0.423	0	0
CP	-0.676796	0.256	0.602	0	0
AKAP9	-0.680091	0.808	0.842	0	0
FTO	-0.681314	0.223	0.424	0	0
TCTN1	-0.683026	0.272	0.548	0	0
ALDH3B1	-0.684438	0.52	0.642	0	0
RIIAD1	-0.685104	0.075	0.431	0	0
PLPPR3	-0.686481	0.021	0.415	0	0
DNAH7	-0.687793	0.154	0.461	0	0
CCDC33	-0.691696	0.017	0.41	0	0
FAM174A	-0.69247	0.405	0.625	0	0
CRNDE	-0.694025	0.507	0.73	0	0
FXYD1	-0.695226	0.041	0.358	0	0
GON7	-0.696296	0.193	0.498	0	0
BBOF1	-0.697308	0.143	0.483	0	0
ATP5IF1	-0.697775	0.833	0.893	0	0
OSCP1	-0.697788	0.198	0.502	0	0
C21orf58	-0.698058	0.12	0.472	0	0
P4HTM	-0.698644	0.376	0.624	0	0
NUDC	-0.700635	0.699	0.771	0	0
FOXJ1	-0.700817	0.431	0.57	0	0
HSPB11	-0.703604	0.465	0.655	0	0
TEKT2	-0.704764	0.124	0.462	0	0
CFAP298	-0.708859	0.487	0.655	0	0
DZIP3	-0.713694	0.164	0.499	0	0
CCDC80	-0.714584	0.041	0.4	0	0
TRAF3IP1	-0.715524	0.242	0.519	0	0
DNAH10	-0.717927	0.055	0.442	0	0
COPRS	-0.72109	0.307	0.575	0	0
TNFAIP8L1	-0.72255	0.051	0.454	0	0
ENDOG	-0.725171	0.275	0.567	0	0
WDR60	-0.727026	0.301	0.55	0	0
RUVBL2	-0.729953	0.278	0.557	0	0
ABCA13	-0.741196	0.109	0.475	0	0
NEK10	-0.743083	0.05	0.463	0	0
CFAP300	-0.743268	0.156	0.474	0	0
VWA3B	-0.745281	0.067	0.459	0	0
STOML3	-0.748565	0.022	0.426	0	0
DNAAF4	-0.749099	0.208	0.51	0	0
SLC22A4	-0.750437	0.022	0.459	0	0
IFT27	-0.750548	0.318	0.583	0	0
MUC16	-0.750949	0.034	0.449	0	0
FHAD1	-0.753223	0.113	0.469	0	0
AC084033.3	-0.754634	0.145	0.495	0	0
WDR78	-0.759078	0.129	0.492	0	0
SRGAP3-AS2	-0.763344	0.017	0.408	0	0
AC007906.2	-0.763654	0.293	0.564	0	0
SPATA18	-0.764267	0.112	0.491	0	0
IQCG	-0.764361	0.237	0.521	0	0
PSCA	-0.766672	0.019	0.349	0	0
METTL7A	-0.769099	0.373	0.726	0	0
EFCAB10	-0.771069	0.042	0.455	0	0
SLC44A4	-0.772393	0.559	0.722	0	0
C6orf118	-0.7725	0.069	0.469	0	0
PACRG	-0.774828	0.046	0.46	0	0
TUBA4B	-0.780241	0.06	0.469	0	0
TUBA1A	-0.78049	0.695	0.779	0	0
SLC27A2	-0.780911	0.051	0.505	0	0
CD59	-0.790632	0.752	0.832	0	0
SSBP4	-0.796761	0.386	0.63	0	0
CCDC153	-0.797089	0.133	0.487	0	0
ZBBX	-0.798247	0.074	0.478	0	0
ANKRD66	-0.800117	0.032	0.458	0	0
CFAP52	-0.801468	0.038	0.468	0	0
CFAP70	-0.802356	0.147	0.494	0	0
PDLIM4	-0.811882	0.123	0.521	0	0
RGCC	-0.815428	0.278	0.674	0	0
DYDC2	-0.826071	0.05	0.456	0	0
CCDC74A	-0.82618	0.079	0.478	0	0
STMND1	-0.82792	0.076	0.476	0	0
ALOX15	-0.82999	0.019	0.431	0	0
CCDC17	-0.830714	0.038	0.467	0	0
WFDC2	-0.834063	0.879	0.898	0	0
C22orf15	-0.838318	0.016	0.444	0	0
DPCD	-0.840828	0.239	0.55	0	0
C12orf75	-0.845389	0.375	0.598	0	0
POLR2I	-0.847425	0.536	0.715	0	0
NEK5	-0.848197	0.061	0.483	0	0
AKAP14	-0.851402	0.024	0.454	0	0
DYNC2H1	-0.853049	0.218	0.539	0	0
ARMC3	-0.85525	0.165	0.507	0	0
STK33	-0.857311	0.216	0.533	0	0
LRRC10B	-0.858553	0.078	0.484	0	0
FAM81B	-0.858855	0.194	0.512	0	0
SRI	-0.865439	0.716	0.843	0	0
CTXN1	-0.86637	0.089	0.486	0	0
S100P	-0.867233	0.15	0.391	0	0
IFT22	-0.868448	0.28	0.569	0	0
TPPP3	-0.868727	0.634	0.672	0	0
DEGS2	-0.872141	0.18	0.562	0	0
CATSPERD	-0.873364	0.032	0.457	0	0
RP1	-0.876058	0.155	0.524	0	0
CFAP126	-0.876343	0.192	0.518	0	0
LRRC23	-0.883007	0.304	0.584	0	0
PPIL6	-0.883974	0.225	0.533	0	0
KCTD12	-0.889153	0.121	0.535	0	0
CFAP73	-0.891762	0.124	0.511	0	0
SPAG16	-0.892758	0.325	0.625	0	0
DRC1	-0.897469	0.076	0.487	0	0
TCTEX1D4	-0.897549	0.07	0.465	0	0
ODF2L	-0.900022	0.442	0.74	0	0
RSPH4A	-0.901395	0.097	0.503	0	0
KIF9	-0.904337	0.307	0.585	0	0
SPEF2	-0.905101	0.137	0.518	0	0
CCDC113	-0.90536	0.102	0.5	0	0
DNAH9	-0.911702	0.031	0.483	0	0
EFHC1	-0.913559	0.342	0.573	0	0
DTHD1	-0.91487	0.056	0.491	0	0
CDHR3	-0.926302	0.104	0.501	0	0
CFAP157	-0.93274	0.097	0.512	0	0
METRN	-0.933815	0.53	0.675	0	0
NME5	-0.935348	0.144	0.524	0	0
SFTPC	-0.938151	0.717	0.482	1.36e-275	3.6e-271
CFAP43	-0.945689	0.085	0.5	0	0
HYDIN	-0.946023	0.122	0.509	0	0
C9orf135	-0.95533	0.188	0.529	0	0
SAXO2	-0.959098	0.089	0.509	0	0
FXYD3	-0.969141	0.711	0.878	0	0
CXCL8	-0.970914	0.345	0.419	1.14e-102	3.04e-98
SPA17	-0.973435	0.261	0.554	0	0
DRC3	-0.990765	0.074	0.512	0	0
AC013264.1	-1.00001	0.13	0.51	0	0
MNS1	-1.00606	0.116	0.521	0	0
TCTEX1D2	-1.00615	0.162	0.551	0	0
UFC1	-1.00668	0.635	0.8	0	0
RSPH9	-1.00734	0.087	0.508	0	0
CIB1	-1.00841	0.717	0.849	0	0
WDR54	-1.01267	0.248	0.573	0	0
CCDC173	-1.0149	0.111	0.512	0	0
ENKUR	-1.02258	0.08	0.512	0	0
H2AFJ	-1.02505	0.392	0.761	0	0
AGR2	-1.03756	0.629	0.819	0	0
SPAG17	-1.04263	0.181	0.527	0	0
FAM229B	-1.04538	0.247	0.575	0	0
FAM216B	-1.04606	0.032	0.504	0	0
CALM1	-1.04629	0.899	0.955	0	0
EFCAB1	-1.05714	0.123	0.534	0	0
CEP126	-1.07854	0.15	0.549	0	0
TEKT1	-1.08947	0.057	0.521	0	0
ARHGAP18	-1.09192	0.318	0.629	0	0
TUBB4B	-1.09547	0.84	0.924	0	0
SPAG6	-1.09628	0.048	0.53	0	0
IK	-1.10203	0.568	0.746	0	0
LDLRAD1	-1.10744	0.045	0.508	0	0
FABP6	-1.11047	0.055	0.478	0	0
BASP1	-1.12217	0.14	0.532	0	0
IGFBP5	-1.13156	0.117	0.572	0	0
KIF21A	-1.13458	0.323	0.643	0	0
WDR38	-1.14052	0.052	0.507	0	0
C11orf97	-1.1427	0.043	0.512	0	0
PLAC8	-1.15699	0.204	0.693	0	0
ROPN1L	-1.16368	0.061	0.524	0	0
IGFBP2	-1.17196	0.454	0.661	0	0
LRRC46	-1.17555	0.066	0.545	0	0
MGP	-1.18811	0.118	0.275	2.05e-300	5.45e-296
MRPS31	-1.20533	0.234	0.63	0	0
DNAH12	-1.21042	0.073	0.531	0	0
SOX2	-1.2126	0.088	0.669	0	0
TMEM190	-1.21867	0.018	0.272	0	0
DYNLL1	-1.21968	0.83	0.931	0	0
PRDX5	-1.21996	0.87	0.944	0	0
OMG	-1.22338	0.027	0.479	0	0
ZMYND10	-1.23199	0.168	0.567	0	0
CCDC78	-1.23603	0.047	0.538	0	0
MARCKS	-1.2383	0.178	0.729	0	0
DNAH5	-1.24151	0.281	0.57	0	0
CLU	-1.25282	0.663	0.863	0	0
CES1	-1.28045	0.206	0.677	0	0
ERICH3	-1.28122	0.061	0.535	0	0
CETN2	-1.28287	0.521	0.697	0	0
MORN5	-1.29077	0.087	0.543	0	0
CFAP53	-1.31367	0.084	0.548	0	0
ALDH1A1	-1.31376	0.521	0.83	0	0
TSPAN19	-1.31852	0.025	0.515	0	0
PSENEN	-1.32149	0.385	0.699	0	0
ODF3B	-1.34254	0.398	0.67	0	0
FAM92B	-1.35436	0.041	0.549	0	0
MS4A8	-1.37458	0.137	0.635	0	0
SAA1	-1.38741	0.043	0.258	0	0
LRRIQ1	-1.38979	0.253	0.577	0	0
GSTA2	-1.40004	0.03	0.378	0	0
CCDC170	-1.40077	0.128	0.566	0	0
C5orf49	-1.40397	0.26	0.612	0	0
DYNLRB2	-1.40953	0.122	0.567	0	0
LCN2	-1.41252	0.341	0.459	7.84e-219	2.08e-214
NUCB2	-1.42004	0.503	0.832	0	0
DNAAF1	-1.42711	0.088	0.537	0	0
TSPAN1	-1.43593	0.459	0.801	0	0
CXCL1	-1.45421	0.117	0.334	0	0
CHST9	-1.46292	0.027	0.694	0	0
CCDC146	-1.47117	0.106	0.589	0	0
C9orf116	-1.49957	0.15	0.591	0	0
SCGB3A1	-1.51707	0.829	0.918	0	0
FAM183A	-1.55106	0.123	0.594	0	0
MORN2	-1.55901	0.345	0.67	0	0
CAPSL	-1.60433	0.086	0.575	0	0
AL357093.2	-1.61705	0.036	0.55	0	0
PIFO	-1.6252	0.245	0.611	0	0
RSPH1	-1.69681	0.249	0.634	0	0
SNTN	-1.69975	0.058	0.579	0	0
C2orf40	-1.77478	0.031	0.54	0	0
SLPI	-1.77846	0.782	0.913	0	0
TFF3	-1.84996	0.265	0.689	0	0
C9orf24	-1.89412	0.239	0.654	0	0
C11orf88	-1.95616	0.079	0.613	0	0
C1orf194	-1.97282	0.131	0.622	0	0
GSTA1	-2.06876	0.248	0.739	0	0
C20orf85	-2.27844	0.088	0.64	0	0
CAPS	-2.56457	0.49	0.81	0	0
BPIFB1	-2.5811	0.088	0.41	0	0
SCGB1A1	-3.45752	0.844	0.947	0	0
*avg_logFC: log fold-chage of the average expression between the two groups.
**pct.1: percentage of cells where the feature is detected in the first group.
†pct.2: percentage of cells where the feature is detected in the second group.
‡p_val_adj: adjusted p-value, based on bonferroni correction using all features in the dataset.

## Sheet: Table_E3
Table E3. DEG between CD84+CD11b+ vs. CD84-CD11b+ myeloid cells in tumor tissue.
Gene name	avg_logFC*	pct.1**	pct.2†	p_value	p_val_adjust‡
SELENOP	1.47302	0.888	0.794	4.03451e-19	8.06902e-16
LGMN	1.01907	0.865	0.841	1.32579e-13	2.65159e-10
CD84	0.978613	1	0.719	1.51646e-56	3.03291e-53
FOLR2	0.908734	0.899	0.76	6.57384e-18	1.31477e-14
CCL18	0.824988	0.876	0.884	5.39825e-06	0.0107965
SCGB3A1	0.777717	1	0.999	2.06912e-08	4.13824e-05
NRP2	0.768526	0.888	0.727	1.59519e-13	3.19037e-10
CCL2	0.697424	0.843	0.684	8.924e-11	1.7848e-07
CCL4L2	0.674085	0.978	0.976	1.93317e-11	3.86634e-08
SLC40A1	0.659244	0.764	0.595	1.38072e-11	2.76144e-08
GPNMB	0.648946	0.978	0.944	6.83956e-08	0.000136791
IER3	0.615975	0.978	0.969	3.28163e-07	0.000656325
LILRB5	0.596138	0.899	0.71	6.56911e-15	1.31382e-11
RNASE1	0.579458	0.809	0.608	1.01997e-12	2.03994e-09
CCL8	0.572775	0.854	0.83	2.50469e-11	5.00937e-08
F13A1	0.553557	0.854	0.698	2.14768e-10	4.29537e-07
TMEM176B	0.55269	0.876	0.769	1.77668e-10	3.55336e-07
PLD3	0.53657	0.933	0.951	1.14234e-07	0.000228468
CCL4	0.53097	0.989	0.993	2.70371e-09	5.40741e-06
A2M	0.513754	0.888	0.723	7.74531e-14	1.54906e-10
CCL3	0.507738	0.978	0.992	1.73731e-06	0.00347462
SGK1	0.490039	0.91	0.933	7.38213e-10	1.47643e-06
MS4A6A	0.489929	0.944	0.937	1.05432e-09	2.10863e-06
CTSB	0.487582	0.989	0.995	1.24092e-09	2.48184e-06
CXCL1	0.482678	0.899	0.948	4.98958e-07	0.000997915
MS4A4A	0.473193	0.978	0.965	3.31225e-07	0.000662451
FPR3	0.457802	0.809	0.677	9.57913e-10	1.91583e-06
RGS1	0.429685	0.876	0.727	4.74004e-09	9.48007e-06
DAB2	0.428895	0.854	0.845	4.05493e-07	0.000810986
PLAU	0.427707	0.921	0.837	9.171e-09	1.8342e-05
CCL3L1	0.41213	1	0.951	1.60416e-08	3.20833e-05
FCGR2B	0.395794	0.82	0.704	4.4784e-08	8.9568e-05
C1QC	0.393082	0.966	0.968	1.65674e-06	0.00331347
CTSZ	0.390744	1	0.997	1.10117e-06	0.00220234
NPL	0.387271	0.933	0.911	4.11317e-08	8.22633e-05
MAFB	0.373859	0.989	0.957	1.5544e-05	0.0310879
LHFPL2	0.359208	0.876	0.801	9.92536e-08	0.000198507
PLA2G7	0.336218	0.899	0.82	1.30252e-09	2.60503e-06
MARCKS	0.326467	0.933	0.911	4.15674e-06	0.00831348
RARRES1	0.324129	0.955	0.885	1.85492e-12	3.70985e-09
TMEM176A	0.316189	0.798	0.659	3.81622e-07	0.000763243
FUCA1	0.313009	0.831	0.804	1.02456e-05	0.0204912
HLA-DMB	0.304552	0.966	0.976	1.31145e-06	0.0026229
RASSF4	0.300884	0.899	0.851	7.31041e-06	0.0146208
PRDM1	0.29982	0.809	0.666	4.53447e-07	0.000906893
C3AR1	0.286796	0.854	0.808	8.12511e-06	0.0162502
SDS	0.267245	0.854	0.753	1.59557e-05	0.0319113
RNASE6	0.266773	0.865	0.801	9.52306e-07	0.00190461
NPC2	0.263815	0.978	0.996	1.36368e-08	2.72737e-05
PLTP	0.263314	0.787	0.682	1.71789e-06	0.00343579
GSTO1	-0.251566	0.933	0.985	6.91525e-07	0.00138305
OLR1	-0.254944	0.944	0.968	5.82737e-07	0.00116547
CD300LF	-0.256004	0.798	0.922	3.22849e-09	6.45698e-06
FCER1G	-0.25767	0.978	0.998	6.05508e-08	0.000121102
GLIPR2	-0.264405	0.921	0.973	1.61007e-07	0.000322015
PYCARD	-0.271568	0.955	0.984	9.8698e-10	1.97396e-06
TNFSF13B	-0.271977	0.865	0.958	2.47058e-10	4.94116e-07
OSCAR	-0.284343	0.854	0.897	9.30086e-08	0.000186017
SPI1	-0.292325	0.955	0.981	1.59738e-09	3.19477e-06
GCA	-0.299416	0.865	0.948	3.61972e-07	0.000723943
GPD1	-0.30246	0.809	0.892	8.36768e-07	0.00167354
CLEC12A	-0.311803	0.719	0.899	2.36027e-12	4.72053e-09
SMIM25	-0.317151	0.921	0.965	8.70678e-09	1.74136e-05
MNDA	-0.328635	0.809	0.946	6.02432e-10	1.20486e-06
STXBP2	-0.333343	0.978	0.975	2.50789e-09	5.01578e-06
FAM89A	-0.352647	0.888	0.924	4.95958e-09	9.91916e-06
TYROBP	-0.353355	1	0.997	9.38562e-12	1.87712e-08
FBP1	-0.354951	0.921	0.96	4.57118e-06	0.00914236
S100A12	-0.371195	0.697	0.78	1.00456e-05	0.0200911
PPARG	-0.387891	0.843	0.834	2.2625e-05	0.0452499
CES1	-0.397934	0.966	0.985	2.04824e-08	4.09647e-05
THBS1	-0.412428	0.697	0.891	6.87841e-11	1.37568e-07
C1orf162	-0.416542	0.955	0.994	8.26129e-12	1.65226e-08
LTA4H	-0.422731	0.899	0.953	5.67925e-09	1.13585e-05
SLC11A1	-0.436587	0.966	0.954	8.85354e-10	1.77071e-06
TIMP1	-0.444137	0.921	0.973	3.21865e-09	6.43731e-06
LST1	-0.450383	0.989	0.983	6.985e-13	1.397e-09
CSTA	-0.458002	0.876	0.948	3.91871e-15	7.83742e-12
ALDH2	-0.475789	0.933	0.975	3.60346e-08	7.20692e-05
S100A8	-0.495038	0.73	0.911	1.01691e-09	2.03381e-06
AC026369.3	-0.510842	0.966	0.961	3.44164e-06	0.00688327
AC020656.1	-0.521176	0.921	0.972	1.0965e-09	2.19301e-06
IGFBP2	-0.541731	0.764	0.925	1.46949e-11	2.93898e-08
TREM1	-0.545055	0.921	0.964	1.15438e-12	2.30876e-09
LYZ	-0.560761	0.989	0.998	1.92298e-12	3.84595e-09
TSPO	-0.567369	0.989	0.995	2.56417e-14	5.12835e-11
SERPINA1	-0.622384	0.966	0.987	2.70282e-17	5.40564e-14
MCEMP1	-0.682235	0.798	0.922	7.32046e-12	1.46409e-08
ALOX5AP	-0.689868	0.865	0.933	1.12209e-07	0.000224419
RETN	-0.699398	0.809	0.927	5.83547e-10	1.16709e-06
INHBA	-0.721468	0.787	0.864	1.51761e-06	0.00303523
CD52	-0.758485	0.91	0.977	5.80714e-15	1.16143e-11
S100A4	-0.762699	0.989	0.996	1.35282e-18	2.70565e-15
MARCO	-0.788079	0.955	0.916	1.22675e-05	0.024535
S100A9	-0.874845	0.966	0.994	3.5033e-12	7.00661e-09
*avg_logFC: log fold-chage of the average expression between the two groups.
**pct.1: percentage of cells where the feature is detected in the first group.
†pct.2: percentage of cells where the feature is detected in the second group.
‡p_val_adj: adjusted p-value, based on bonferroni correction using all features in the dataset.

## Sheet: Table_E4
Table E4. DEG between CD84+CD11b+ vs. CD84-CD11b+ myeloid cells in normal lung tissue.
Gene name	avg_logFC*	pct.1**	pct.2†	p_value	p_val_adjust‡
SELENOP	1.38913	0.929	0.838	4.86e-26	9.72e-23
CD84	1.26814	1	0.682	9.52e-60	1.9e-56
CCL2	1.14595	0.879	0.799	1.03e-15	2.06e-12
LGMN	1.01913	0.939	0.789	5.04e-21	1.01e-17
CCL18	1.00817	0.848	0.692	3.32e-06	0.00663138
RGS1	1.0005	0.899	0.648	7.43e-19	1.49e-15
FOLR2	0.989008	0.98	0.729	5.31e-26	1.06e-22
SLC40A1	0.951024	0.717	0.527	5.46e-11	1.09e-07
RNASE1	0.877354	0.828	0.615	2.3e-15	4.59e-12
GPNMB	0.789251	0.96	0.881	1.83e-09	3.67e-06
MS4A4A	0.754194	0.97	0.906	2.5e-14	4.99e-11
CTSB	0.749278	1	0.964	1.13e-12	2.26e-09
DAB2	0.72947	0.869	0.746	1.81e-14	3.62e-11
CCL4L2	0.726213	0.97	0.935	4.18e-12	8.35e-09
SGK1	0.713481	0.939	0.874	5.25e-14	1.05e-10
PLAU	0.702644	0.949	0.848	4.62e-16	9.24e-13
A2M	0.696626	0.919	0.66	6.95e-21	1.39e-17
F13A1	0.649597	0.788	0.578	1.17e-11	2.34e-08
TMEM176B	0.641969	0.879	0.699	5.54e-15	1.11e-11
GPR183	0.64025	0.929	0.829	9.87e-11	1.97e-07
CCL4	0.637369	0.98	0.954	2.86e-08	5.73e-05
TREM2	0.618729	0.899	0.864	4.13e-11	8.27e-08
FCGR2B	0.61739	0.778	0.659	8.56e-11	1.71e-07
NRP2	0.593242	0.889	0.648	3.82e-16	7.64e-13
CHIT1	0.586875	0.909	0.888	8.71e-15	1.74e-11
PLTP	0.566398	0.778	0.655	2.52e-10	5.04e-07
CCL3	0.555912	0.98	0.955	4.76e-06	0.00951172
GPR34	0.555144	0.808	0.713	1.97e-09	3.95e-06
PLA2G7	0.548748	0.96	0.832	8.3e-21	1.66e-17
PLD3	0.536167	0.97	0.887	4.72e-12	9.44e-09
FPR3	0.520832	0.818	0.646	6e-12	1.2e-08
MS4A6A	0.513844	0.939	0.849	1.51e-11	3.03e-08
TMEM176A	0.512233	0.768	0.574	9.41e-10	1.88e-06
LILRB5	0.493857	0.657	0.492	4.06e-09	8.12e-06
CTSZ	0.477967	0.98	0.964	5.74e-07	0.00114844
CCL8	0.473722	0.798	0.649	1.64e-13	3.27e-10
C3AR1	0.459344	0.838	0.756	1.75e-09	3.49e-06
LHFPL2	0.444276	0.818	0.713	2.06e-08	4.12e-05
SDS	0.44167	0.859	0.625	1e-12	2.01e-09
SDC2	0.437092	0.899	0.686	3.36e-16	6.73e-13
CSF1R	0.436908	0.929	0.841	2.61e-10	5.21e-07
CPM	0.43404	0.818	0.714	2.32e-07	0.000464438
LIPA	0.424839	0.97	0.928	4.8e-06	0.00959106
C1QC	0.422584	0.96	0.893	6.55e-08	0.00013098
NPC2	0.419261	0.99	0.978	1.25e-12	2.5e-09
HLA-DPA1	0.414876	1	0.994	5.89e-09	1.18e-05
HLA-DQA1	0.389884	1	0.951	4.1e-09	8.21e-06
HLA-DPB1	0.387975	1	0.993	4.61e-10	9.23e-07
RNASE6	0.384775	0.737	0.628	6.28e-06	0.0125641
FCGR2A	0.374514	0.96	0.935	1.37e-05	0.0273272
CD14	0.373025	0.97	0.94	1.69e-05	0.0338062
CXCL1	0.370001	0.909	0.833	2.51e-09	5.02e-06
FUCA1	0.335434	0.788	0.644	5.54e-09	1.11e-05
STAB1	0.334412	0.758	0.721	7.53e-06	0.0150606
C1QB	0.332448	0.949	0.896	2.21e-05	0.0442042
HLA-DRA	0.32732	0.99	0.994	1.07e-07	0.000213241
NPL	0.324035	0.909	0.856	1.69e-06	0.00337068
CD63	0.321716	0.99	0.986	1.7e-05	0.0339251
HLA-DQB1	0.321492	1	0.985	2.36e-07	0.000472655
MARCKS	0.315602	1	0.892	1.07e-09	2.14e-06
OTUD1	0.309985	0.889	0.786	2.39e-05	0.0478053
CREG1	0.307545	0.939	0.844	2.35e-05	0.046926
CTSK	0.298964	0.788	0.659	1.04e-05	0.0207338
CD74	0.293322	0.99	0.993	7.73e-07	0.00154682
HLA-DMB	0.283869	0.96	0.933	6.72e-06	0.0134475
PRDM1	0.282082	0.697	0.571	1.6e-05	0.0320384
HLA-DMA	0.266618	0.99	0.952	1.04e-05	0.0207098
CHI3L1	0.259237	0.848	0.58	6.59e-15	1.32e-11
GBP1	-0.250207	0.485	0.706	8.49e-06	0.0169745
CD300LF	-0.256879	0.747	0.849	1.55e-06	0.00310331
BST1	-0.270284	0.838	0.868	7.05e-07	0.00140921
SPI1	-0.273747	0.859	0.946	9.5e-06	0.0190014
MIR3945HG	-0.278556	0.485	0.685	3.86e-07	0.000772599
JAML	-0.280228	0.768	0.911	5.28e-07	0.00105622
CPE	-0.282293	0.646	0.736	7.11e-07	0.00142294
NCF2	-0.303891	0.889	0.952	9.88e-10	1.98e-06
AGRP	-0.304902	0.495	0.744	1.67e-11	3.34e-08
CLEC12A	-0.307383	0.646	0.826	1.46e-08	2.91e-05
CTSS	-0.309084	0.99	0.991	1.45e-07	0.000289254
TYROBP	-0.319491	0.99	0.995	2.54e-10	5.09e-07
UPP1	-0.328667	0.788	0.901	3.18e-08	6.36e-05
SNX10	-0.330309	0.697	0.831	1.47e-05	0.0293705
RBP7	-0.342363	0.556	0.781	1.55e-11	3.11e-08
TNFAIP6	-0.342875	0.566	0.78	8.3e-11	1.66e-07
GPD1	-0.344047	0.455	0.715	4.92e-11	9.84e-08
FPR2	-0.348043	0.222	0.598	8.75e-09	1.75e-05
FGR	-0.355223	0.869	0.934	1.37e-08	2.75e-05
OSCAR	-0.358895	0.747	0.851	2.23e-08	4.46e-05
MNDA	-0.361264	0.758	0.925	1.27e-08	2.54e-05
OASL	-0.376719	0.798	0.862	4.3e-07	0.000860899
C1orf162	-0.388514	0.899	0.932	1.09e-06	0.00217891
PYCARD	-0.389813	0.899	0.948	5.68e-09	1.14e-05
FAM89A	-0.400022	0.737	0.784	2.92e-06	0.00584277
IL1RN	-0.412494	0.616	0.821	2.8e-07	0.000560679
AQP9	-0.435413	0.667	0.78	1.51e-06	0.00301565
SMIM25	-0.466095	0.879	0.879	9.96e-09	1.99e-05
LTA4H	-0.477471	0.818	0.844	2.78e-07	0.000555189
CFP	-0.482633	0.747	0.814	5.49e-06	0.0109704
ISG15	-0.48483	0.828	0.891	4.81e-08	9.63e-05
IL1A	-0.513986	0.879	0.88	5.09e-08	0.000101899
TREM1	-0.548303	0.828	0.905	6.17e-10	1.23e-06
CSTA	-0.576722	0.818	0.894	1.94e-13	3.87e-10
TSPO	-0.581553	0.96	0.986	1.2e-14	2.4e-11
SLC11A1	-0.591682	0.889	0.936	7.45e-14	1.49e-10
THBS1	-0.616613	0.434	0.756	4.84e-13	9.69e-10
ALDH2	-0.619764	0.899	0.924	1.03e-07	0.000205175
LST1	-0.62523	0.939	0.974	8.56e-13	1.71e-09
STXBP2	-0.646968	0.848	0.927	1.91e-14	3.81e-11
IGFBP2	-0.671724	0.364	0.82	1.08e-19	2.16e-16
AC020656.1	-0.684863	0.859	0.959	3.77e-14	7.53e-11
SERPINA1	-0.733488	0.747	0.945	2.33e-17	4.66e-14
S100A4	-0.735355	0.939	0.993	1.29e-19	2.59e-16
TGM2	-0.746039	0.838	0.86	3.01e-07	0.000602342
PLAC8	-0.759784	0.768	0.882	4.09e-21	8.18e-18
BCL2A1	-0.775504	0.97	0.968	6.22e-11	1.24e-07
CD52	-0.790584	0.859	0.92	5.77e-14	1.15e-10
TIMP1	-0.815925	0.788	0.932	5.98e-10	1.2e-06
MCEMP1	-0.823062	0.586	0.793	4.32e-12	8.64e-09
CES1	-0.831918	0.859	0.875	8.32e-10	1.66e-06
LYZ	-0.867134	0.98	0.993	2.61e-16	5.21e-13
FCN1	-0.868254	0.525	0.78	2.57e-10	5.14e-07
ALOX5AP	-0.87254	0.778	0.896	6.31e-08	0.000126298
S100A8	-1.02016	0.596	0.852	5.73e-14	1.15e-10
RETN	-1.03263	0.717	0.846	1.8e-11	3.6e-08
S100A9	-1.31559	0.939	0.973	7.64e-15	1.53e-11
FABP4	-1.80802	0.687	0.771	8.37e-06	0.0167419
*avg_logFC: log fold-chage of the average expression between the two groups.
**pct.1: percentage of cells where the feature is detected in the first group.
†pct.2: percentage of cells where the feature is detected in the second group.
‡p_val_adj: adjusted p-value, based on bonferroni correction using all features in the dataset.

## Sheet: Table_E5
Table E5. DEG between cancer-associated fibroblasts vs. the rest of fibroblasts.
Gene name	avg_logFC*	pct.1**	pct.2†	p_value	p_val_adjust‡
IGFBP2	0.813283	0.905	0.763	1.71629e-43	3.43257e-40
COL4A1	0.723035	0.809	0.605	1.25575e-32	2.51151e-29
COL4A2	0.70526	0.852	0.565	1.85325e-46	3.70649e-43
NDUFA4L2	0.700442	0.859	0.543	6.4872e-48	1.29744e-44
SYNPO2	0.662536	0.788	0.538	2.28538e-31	4.57076e-28
APOE	0.646033	0.898	0.847	5.39893e-26	1.07979e-22
TINAGL1	0.621155	0.834	0.239	6.28187e-56	1.25637e-52
CALD1	0.617703	0.958	0.967	3.77317e-53	7.54635e-50
KCNK3	0.596669	0.523	0.194	1.36156e-12	2.72311e-09
MCAM	0.562672	0.862	0.244	1.02367e-52	2.04734e-49
CHN1	0.561996	0.742	0.473	1.26017e-31	2.52034e-28
RGS5	0.560387	0.894	0.723	7.08242e-47	1.41648e-43
F2R	0.559112	0.82	0.558	1.45977e-22	2.91954e-19
BGN	0.553245	0.933	0.86	1.87611e-34	3.75222e-31
MYH11	0.54761	0.834	0.274	1.13994e-38	2.27989e-35
ASPN	0.542827	0.869	0.806	2.43349e-13	4.86698e-10
COX4I2	0.525539	0.806	0.751	6.23313e-38	1.24663e-34
CARMN	0.52046	0.717	0.351	9.3698e-25	1.87396e-21
ITGA1	0.498942	0.714	0.467	7.40089e-19	1.48018e-15
LMOD1	0.497052	0.781	0.567	3.50036e-22	7.00073e-19
FOXF1	0.488245	0.859	0.698	3.20133e-38	6.40266e-35
MFGE8	0.47784	0.94	0.919	6.37428e-19	1.27486e-15
GJA4	0.477044	0.742	0.22	3.7517e-40	7.5034e-37
TPM1	0.473445	0.954	0.931	4.63227e-27	9.26454e-24
CAV2	0.469419	0.866	0.576	2.0542e-33	4.10839e-30
MAP1B	0.466916	0.912	0.908	3.55546e-23	7.11093e-20
PERP	0.458895	0.834	0.824	9.61776e-20	1.92355e-16
IGFBP3	0.449832	0.866	0.796	1.17556e-05	0.0235112
CAV1	0.433864	0.876	0.763	5.1382e-16	1.02764e-12
ADGRG6	0.423305	0.714	0.592	1.34585e-23	2.6917e-20
EGFL6	0.421828	0.678	0.297	8.51435e-26	1.70287e-22
GUCY1A2	0.419383	0.792	0.618	1.57937e-17	3.15874e-14
ID4	0.410618	0.869	0.839	4.97545e-08	9.95091e-05
CNN1	0.408926	0.933	0.376	2.20225e-63	4.40449e-60
HIGD1B	0.408382	0.675	0.16	1.37643e-29	2.75286e-26
C2orf40	0.403223	0.869	0.703	1.01661e-11	2.03321e-08
EDIL3	0.379567	0.65	0.401	3.22561e-17	6.45123e-14
PREX2	0.379379	0.855	0.47	3.04509e-41	6.09018e-38
DKK3	0.366723	0.88	0.762	2.17573e-13	4.35146e-10
TBX3	0.364019	0.611	0.47	6.43508e-07	0.00128702
PCSK1N	0.347706	0.693	0.418	8.60167e-21	1.72033e-17
PLS3	0.345315	0.837	0.773	9.18954e-10	1.83791e-06
CCND1	0.339466	0.943	0.869	1.2574e-22	2.5148e-19
FILIP1L	0.334033	0.799	0.718	7.93837e-12	1.58767e-08
ARHGAP29	0.331242	0.837	0.688	7.74695e-14	1.54939e-10
NR2F2	0.324086	0.922	0.852	3.4246e-10	6.84921e-07
ADGRF5	0.321433	0.65	0.325	4.05038e-18	8.10076e-15
TAGLN	0.321087	0.929	0.886	4.13152e-29	8.26303e-26
WWTR1	0.320315	0.862	0.599	1.82458e-25	3.64916e-22
ACTA2	0.315378	0.915	0.634	3.95206e-38	7.90412e-35
FHL5	0.314776	0.678	0.164	3.29399e-34	6.58799e-31
CSRP2	0.311164	0.77	0.55	7.3465e-20	1.4693e-16
WIF1	0.308547	0.767	0.668	2.55383e-23	5.10767e-20
LRRC32	0.30284	0.675	0.442	6.49844e-17	1.29969e-13
EPAS1	0.295768	0.633	0.508	2.07568e-09	4.15136e-06
HES4	0.288853	0.816	0.637	1.01632e-20	2.03265e-17
NES	0.285692	0.728	0.371	1.25777e-28	2.51553e-25
TNFRSF12A	0.282392	0.926	0.771	9.51883e-22	1.90377e-18
CCDC88A	0.274162	0.753	0.605	3.87342e-11	7.74683e-08
MYO1B	0.273857	0.597	0.375	8.93779e-08	0.000178756
WFDC1	0.272996	0.551	0.309	1.18368e-05	0.0236735
MYL9	0.270701	0.94	0.919	8.77814e-34	1.75563e-30
CORO1C	0.269794	0.894	0.65	9.42161e-23	1.88432e-19
VIM	0.266088	1	0.999	2.10319e-10	4.20637e-07
TBX2	0.266052	0.671	0.491	1.37498e-07	0.000274995
NOV	0.264489	0.929	0.739	1.78224e-46	3.56447e-43
CAVIN1	0.263715	0.94	0.945	2.61805e-07	0.000523611
ENAH	0.256603	0.813	0.683	8.52519e-11	1.70504e-07
TSC22D1	0.256253	0.852	0.835	8.03873e-06	0.0160775
ADAMTS9	0.253905	0.82	0.459	6.10323e-44	1.22065e-40
CRIM1	0.24102	0.788	0.645	7.65303e-09	1.53061e-05
NRGN	0.240291	0.735	0.193	2.07785e-28	4.15569e-25
PXDN	0.235597	0.686	0.564	4.31853e-10	8.63707e-07
PLN	0.226573	0.845	0.274	2.56816e-41	5.13631e-38
MYH10	0.223284	0.746	0.56	2.44367e-09	4.88733e-06
SERPINE1	0.221649	0.841	0.556	1.3068e-32	2.6136e-29
TSPO	0.219773	0.961	0.965	1.44127e-06	0.00288254
CRYAB	0.219455	0.958	0.981	1.82934e-07	0.000365869
MAOA	0.218857	0.908	0.788	1.55794e-26	3.11589e-23
MYOCD	0.218353	0.541	0.169	5.13196e-06	0.0102639
LAMC3	0.215363	0.618	0.393	3.61194e-12	7.22388e-09
EBF1	0.214731	0.94	0.916	6.60815e-09	1.32163e-05
ODF3B	0.213893	0.816	0.578	2.59062e-13	5.18125e-10
ESAM	0.212993	0.717	0.403	3.74457e-24	7.48915e-21
ALDH1A2	0.211534	0.898	0.699	2.76132e-36	5.52264e-33
SNCG	0.210717	0.869	0.38	9.59836e-48	1.91967e-44
NEXN	0.209347	0.756	0.565	8.68073e-10	1.73615e-06
ATP1A2	0.207119	0.756	0.178	8.48931e-49	1.69786e-45
PFN2	0.202461	0.912	0.574	1.22455e-30	2.44909e-27
TM4SF1	0.201322	0.647	0.364	1.4767e-10	2.95341e-07
COL14A1	0.19428	0.866	0.676	3.45126e-06	0.00690252
SULF1	0.184133	0.936	0.883	2.8769e-13	5.75379e-10
MRC1	0.181965	0.936	0.748	3.40499e-45	6.80997e-42
AQP1	0.180823	0.703	0.61	3.71642e-07	0.000743284
RCAN2	0.17928	0.739	0.685	1.99692e-07	0.000399384
MYLK	0.17713	0.763	0.526	6.32795e-16	1.26559e-12
CDH13	0.175229	0.862	0.429	3.65867e-35	7.31734e-32
HLA-DMB	0.174768	0.905	0.693	4.22358e-52	8.44716e-49
ERG	0.169185	0.862	0.517	1.58527e-46	3.17055e-43
SLC4A4	0.166336	0.834	0.467	1.99199e-51	3.98398e-48
ITGA8	0.165953	0.83	0.505	1.54282e-15	3.08563e-12
IGFBP7	0.164809	1	0.995	1.21686e-06	0.00243371
FRZB	0.162441	0.664	0.388	2.84525e-10	5.69051e-07
BASP1	0.162166	0.777	0.653	1.0915e-11	2.183e-08
CADM1	0.160757	0.537	0.278	1.81743e-06	0.00363486
CTNNAL1	0.1599	0.901	0.647	5.38864e-20	1.07773e-16
DPT	0.158	0.378	0.605	1.1123e-11	2.2246e-08
LAPTM5	0.155517	0.933	0.823	4.70921e-13	9.41843e-10
ANGPT2	0.154672	0.622	0.205	2.30763e-13	4.61526e-10
TGFBI	0.153551	0.396	0.614	1.32037e-06	0.00264074
NTRK3	0.152531	0.82	0.344	3.80827e-39	7.61655e-36
TPM2	0.151361	0.922	0.77	4.34906e-31	8.69813e-28
CPM	0.15061	0.622	0.414	3.08091e-09	6.16183e-06
METRN	0.150403	0.767	0.67	1.13105e-05	0.0226211
OSBPL6	0.142774	0.767	0.573	3.09829e-17	6.19658e-14
PPP1R14A	0.140116	0.855	0.505	7.3817e-25	1.47634e-21
LINC01436	0.139484	0.958	0.803	7.97319e-15	1.59464e-11
SCGB1A1	0.138174	1	0.999	1.16729e-07	0.000233458
ARRDC4	0.138076	0.792	0.653	4.94617e-23	9.89234e-20
LHFPL2	0.13794	0.551	0.312	1.34752e-07	0.000269503
LPL	0.136159	0.336	0.349	3.75413e-08	7.50825e-05
SAMD5	0.135764	0.735	0.363	8.55443e-31	1.71089e-27
COL10A1	0.135361	0.572	0.35	9.36568e-08	0.000187314
DRAM1	0.134374	0.908	0.67	1.48248e-24	2.96496e-21
RERGL	0.129606	0.841	0.181	3.75371e-65	7.50743e-62
STEAP4	0.123741	0.201	0.442	2.40362e-19	4.80725e-16
GRP	0.120594	0.265	0.384	2.92202e-15	5.84403e-12
CCL8	0.120359	0.777	0.618	4.17824e-06	0.00835648
SCGB3A1	0.120067	0.996	0.988	6.95808e-06	0.0139162
CX3CL1	0.119106	0.915	0.407	1.85418e-67	3.70837e-64
SFTPD	0.117426	0.929	0.628	2.15166e-32	4.30332e-29
SOX11	0.115841	0.548	0.354	7.01011e-07	0.00140202
KIF21A	0.115147	0.845	0.706	4.02912e-29	8.05823e-26
MBIP	0.114623	0.82	0.713	3.7177e-07	0.000743541
CRIP2	0.109343	0.802	0.703	3.80433e-07	0.000760866
TNNT2	0.108063	0.537	0.147	9.0257e-23	1.80514e-19
AL357093.2	0.103975	0.94	0.573	1.733e-24	3.466e-21
ACTG2	0.102187	0.777	0.205	1.70931e-36	3.41862e-33
TMEM231	-0.102321	0.17	0.559	3.89422e-52	7.78844e-49
SPINK1	-0.105022	0.134	0.32	9.19031e-23	1.83806e-19
CCL20	-0.105753	0.187	0.643	1.34296e-61	2.68592e-58
FAM107A	-0.105857	0.898	0.845	2.51472e-13	5.02943e-10
TACSTD2	-0.106418	0.343	0.622	2.26828e-19	4.53656e-16
CDC42EP5	-0.10934	0.608	0.729	9.3469e-09	1.86938e-05
CENPW	-0.11084	0.686	0.811	3.74145e-31	7.4829e-28
CILP	-0.114177	0.943	0.896	1.32592e-20	2.65184e-17
FAP	-0.114414	0.057	0.292	6.26502e-20	1.253e-16
CREB3L1	-0.115166	0.929	0.863	6.14571e-06	0.0122914
LURAP1L	-0.116327	0.382	0.604	2.24506e-14	4.49011e-11
ADAMTS8	-0.11809	0.219	0.282	1.66687e-14	3.33374e-11
HAS1	-0.118953	0.943	0.901	6.08014e-12	1.21603e-08
CLIC3	-0.119094	0.947	0.908	3.20228e-11	6.40456e-08
SOX9	-0.120344	0.106	0.333	1.21726e-07	0.000243451
HIST1H1C	-0.120445	0.523	0.71	7.55238e-12	1.51048e-08
IFIT3	-0.120564	0.473	0.703	3.31371e-18	6.62742e-15
KLF5	-0.121825	0.261	0.623	4.13166e-33	8.26332e-30
FMO3	-0.122024	0.265	0.365	3.26807e-12	6.53613e-09
SFTA1P	-0.123311	0.322	0.474	1.45656e-11	2.91312e-08
CAPG	-0.123898	0.724	0.821	6.98243e-20	1.39649e-16
PIGR	-0.124182	0.329	0.593	2.4269e-20	4.85381e-17
TNFAIP6	-0.124657	0.876	0.869	1.22084e-05	0.0244169
PDLIM4	-0.125105	0.919	0.914	4.25847e-22	8.51694e-19
BCL2A1	-0.125232	0.343	0.49	8.04678e-10	1.60936e-06
CCL4L2	-0.12676	0.558	0.662	9.14525e-06	0.0182905
AC078864.2	-0.12861	0.088	0.337	1.15608e-19	2.31217e-16
AKR1B1	-0.129498	0.912	0.933	1.14226e-07	0.000228452
PLCG2	-0.133067	0.466	0.657	5.77168e-06	0.0115434
GZMH	-0.133342	0.943	0.883	2.81314e-10	5.62627e-07
LAPTM4B	-0.133419	0.47	0.64	4.0645e-10	8.129e-07
TXN	-0.136753	0.859	0.929	1.15988e-05	0.0231976
MRPS31	-0.137184	0.576	0.72	9.45237e-10	1.89047e-06
IFIT1	-0.137291	0.883	0.88	2.01911e-08	4.03822e-05
FSCN1	-0.137638	0.608	0.704	2.89978e-10	5.79956e-07
IL1R1	-0.141455	0.304	0.453	1.55125e-13	3.10251e-10
PRDX5	-0.141642	0.968	0.965	4.56134e-06	0.00912268
EPHA3	-0.141815	0.17	0.399	2.58641e-06	0.00517282
MME	-0.143501	0.138	0.643	8.48558e-67	1.69712e-63
ERRFI1	-0.143635	0.827	0.901	9.96907e-10	1.99381e-06
FGFBP2	-0.143823	0.883	0.832	1.31333e-22	2.62667e-19
LRRK2	-0.144221	0.092	0.367	1.24356e-33	2.48712e-30
RASSF4	-0.151448	0.498	0.811	1.80844e-45	3.61688e-42
CYP3A5	-0.151932	0.463	0.694	3.55343e-33	7.10686e-30
IL6	-0.15329	0.841	0.901	5.28527e-13	1.05705e-09
HEXB	-0.155199	0.961	0.948	5.44441e-08	0.000108888
FXYD1	-0.15544	0.965	0.968	6.16633e-07	0.00123327
INSIG1	-0.156965	0.502	0.743	2.71179e-21	5.42358e-18
GZMB	-0.158941	0.802	0.771	9.36245e-10	1.87249e-06
NPDC1	-0.161179	0.933	0.902	1.07372e-06	0.00214745
MFAP2	-0.162548	0.293	0.547	2.37708e-17	4.75415e-14
IGFBP5	-0.163609	0.926	0.964	1.36362e-05	0.0272724
AKR1C2	-0.163672	0.912	0.844	3.19875e-32	6.3975e-29
PENK	-0.164099	0.092	0.38	1.0835e-14	2.167e-11
ATP6V1F	-0.166919	0.735	0.902	1.13554e-08	2.27107e-05
GSTO1	-0.167042	0.813	0.894	1.1876e-07	0.00023752
DES	-0.167404	0.53	0.192	2.14212e-05	0.0428424
C1QB	-0.167933	0.191	0.712	5.53048e-56	1.1061e-52
PTPN13	-0.169014	0.523	0.612	3.34212e-06	0.00668424
PRSS23	-0.169551	0.837	0.924	5.13495e-06	0.0102699
LTC4S	-0.170565	0.742	0.815	3.06383e-33	6.12766e-30
PCDH9	-0.171306	0.827	0.792	1.03814e-16	2.07628e-13
CPVL	-0.17239	0.961	0.94	2.34644e-10	4.69289e-07
SLC40A1	-0.175859	0.399	0.527	6.00106e-06	0.0120021
OMG	-0.175931	0.085	0.33	7.9867e-11	1.59734e-07
ETV1	-0.178474	0.276	0.447	9.88921e-11	1.97784e-07
TIMP3	-0.182008	0.965	0.967	2.39444e-18	4.78888e-15
HHIP-AS1	-0.182993	0.94	0.901	4.22984e-15	8.45968e-12
ALOX5AP	-0.18509	0.484	0.854	3.35883e-56	6.71766e-53
NCOA7	-0.1862	0.491	0.743	1.59709e-16	3.19419e-13
ABCG1	-0.187337	0.399	0.827	1.58415e-71	3.16831e-68
CXCL12	-0.190094	0.622	0.649	1.89342e-06	0.00378684
FLRT2	-0.190528	0.859	0.884	7.75422e-09	1.55084e-05
BST1	-0.19212	0.89	0.9	7.51896e-21	1.50379e-17
RND3	-0.192389	0.587	0.743	2.2971e-09	4.5942e-06
EGR1	-0.192405	0.792	0.877	1.04159e-06	0.00208317
CAMK2N1	-0.197037	0.53	0.697	2.03519e-12	4.07038e-09
MXRA8	-0.199964	0.816	0.865	1.44109e-06	0.00288219
ELF3	-0.20014	0.191	0.563	4.71013e-43	9.42025e-40
IL1B	-0.200578	0.102	0.531	2.36188e-62	4.72377e-59
HLA-DPA1	-0.201136	0.809	0.878	3.83576e-10	7.67152e-07
SPARCL1	-0.203539	0.965	0.976	4.33082e-09	8.66164e-06
ADAMTSL4	-0.205456	0.94	0.862	3.17817e-14	6.35634e-11
VAMP5	-0.206109	0.77	0.868	6.99527e-11	1.39905e-07
RASSF9	-0.208175	0.049	0.353	9.10892e-39	1.82178e-35
TCIM	-0.208269	0.325	0.427	2.73139e-11	5.46279e-08
CD248	-0.208781	0.951	0.961	2.22595e-11	4.4519e-08
CCL5	-0.213436	0.777	0.776	2.77128e-08	5.54255e-05
MAMDC2	-0.215532	0.279	0.477	4.63406e-12	9.26811e-09
DYNC2H1	-0.215709	0.226	0.443	3.79322e-24	7.58644e-21
S100A4	-0.221625	0.993	0.998	1.95491e-13	3.90983e-10
PRG4	-0.221762	0.102	0.344	1.36829e-19	2.73658e-16
TGM2	-0.224648	0.279	0.491	9.74744e-11	1.94949e-07
BIRC3	-0.225828	0.622	0.679	3.90013e-07	0.000780026
CYP27A1	-0.229075	0.795	0.888	1.42177e-27	2.84354e-24
CNTFR	-0.230343	0.933	0.892	2.91307e-23	5.82613e-20
COL6A3	-0.233046	0.65	0.756	2.43932e-09	4.87865e-06
HEG1	-0.234263	0.788	0.785	5.97625e-08	0.000119525
PTGDS	-0.235454	0.102	0.617	1.03303e-74	2.06606e-71
FTL	-0.237714	1	0.999	2.32511e-09	4.65023e-06
HSPB6	-0.238671	0.947	0.923	1.75484e-07	0.000350969
SSPN	-0.244043	0.947	0.919	3.28325e-08	6.56649e-05
PDK4	-0.250295	0.65	0.768	1.55225e-10	3.10449e-07
ABCA1	-0.254962	0.286	0.585	3.84469e-23	7.68938e-20
CD14	-0.255578	0.226	0.637	5.29505e-49	1.05901e-45
NPY1R	-0.258111	0.936	0.921	4.48178e-34	8.96356e-31
BMP5	-0.26147	0.032	0.307	3.22249e-35	6.44497e-32
NTNG1	-0.261531	0.042	0.345	2.37292e-52	4.74584e-49
RAMP2	-0.264973	0.936	0.944	8.79889e-21	1.75978e-17
DUSP6	-0.268561	0.23	0.543	4.8725e-21	9.745e-18
INMT	-0.270711	0.456	0.689	2.29355e-19	4.5871e-16
ITIH5	-0.274026	0.505	0.661	2.0209e-11	4.0418e-08
AKR1C3	-0.274219	0.883	0.826	6.78809e-20	1.35762e-16
ACVRL1	-0.275988	0.792	0.922	1.86637e-30	3.73274e-27
ALDH2	-0.277309	0.958	0.946	6.74526e-07	0.00134905
CSTB	-0.278393	0.887	0.946	7.7587e-09	1.55174e-05
RSPO3	-0.279799	0.958	0.871	1.99168e-14	3.98337e-11
TCF21	-0.281764	0.562	0.696	2.22128e-15	4.44255e-12
FSTL3	-0.282297	0.654	0.797	1.56581e-14	3.13162e-11
MAFB	-0.284563	0.77	0.853	1.03919e-08	2.07838e-05
CCDC102B	-0.286776	0.396	0.582	1.23601e-10	2.47202e-07
PLAC9	-0.286823	0.968	0.959	3.3525e-16	6.70499e-13
TIMP1	-0.296991	0.982	0.997	1.35951e-05	0.0271901
CTSL	-0.297999	0.784	0.873	1.09078e-11	2.18156e-08
LIFR	-0.298935	0.081	0.345	3.66819e-24	7.33638e-21
COL6A6	-0.299152	0.064	0.28	1.01864e-29	2.03727e-26
SRPX	-0.299217	0.124	0.445	3.67627e-17	7.35255e-14
WNT2	-0.299229	0.035	0.425	1.5337e-52	3.06739e-49
GLRX	-0.301482	0.88	0.913	1.01635e-23	2.0327e-20
METTL7A	-0.301535	0.795	0.866	5.39662e-15	1.07932e-11
GSTM5	-0.301537	0.905	0.858	2.86459e-13	5.72918e-10
SEMA3D	-0.302507	0.102	0.409	1.33762e-29	2.67523e-26
SPRY1	-0.304585	0.657	0.738	1.42717e-09	2.85434e-06
PRRX1	-0.305411	0.922	0.93	1.30316e-15	2.60632e-12
MYC	-0.310597	0.88	0.895	1.89835e-12	3.7967e-09
GDF10	-0.316022	0.322	0.53	4.97591e-11	9.95182e-08
SHISA3	-0.316536	0.862	0.86	1.69037e-27	3.38073e-24
NPC2	-0.320286	0.83	0.914	3.13956e-15	6.27911e-12
KCTD12	-0.321403	0.442	0.669	1.17471e-17	2.34942e-14
COL6A2	-0.321761	0.975	0.976	1.31892e-14	2.63784e-11
TNFAIP2	-0.322416	0.848	0.894	3.03346e-21	6.06691e-18
TMEM176A	-0.323972	0.205	0.605	4.53739e-39	9.07478e-36
CCBE1	-0.327807	0.064	0.354	2.00158e-39	4.00317e-36
LSAMP	-0.328376	0.145	0.437	1.91165e-36	3.8233e-33
TNFSF10	-0.328797	0.936	0.826	1.40725e-17	2.8145e-14
ISLR	-0.32987	0.869	0.881	2.29505e-12	4.59009e-09
GALNT15	-0.330319	0.943	0.941	1.4707e-30	2.94141e-27
SOCS3	-0.3313	0.792	0.909	7.58306e-11	1.51661e-07
NUPR1	-0.333996	0.915	0.975	1.65428e-14	3.30855e-11
CTSH	-0.342273	0.827	0.913	5.20865e-24	1.04173e-20
PLAT	-0.351413	0.696	0.88	8.60858e-19	1.72172e-15
G0S2	-0.354272	0.678	0.751	5.37352e-12	1.0747e-08
MOXD1	-0.354361	0.049	0.4	9.71151e-51	1.9423e-47
PIEZO2	-0.355144	0.032	0.347	3.95574e-37	7.91148e-34
F3	-0.356217	0.926	0.921	6.31036e-22	1.26207e-18
HSPB8	-0.357997	0.908	0.873	3.69599e-25	7.39197e-22
CPE	-0.359155	0.915	0.931	1.38381e-08	2.76761e-05
CDH11	-0.366651	0.247	0.515	3.93807e-20	7.87615e-17
CYP4B1	-0.373091	0.954	0.946	2.56679e-35	5.13357e-32
PLD3	-0.374993	0.905	0.913	9.26749e-13	1.8535e-09
PLBD1	-0.376116	0.943	0.954	2.81613e-27	5.63226e-24
CREG1	-0.3816	0.739	0.841	4.24703e-19	8.49407e-16
CLU	-0.384575	0.982	0.974	1.50758e-10	3.01515e-07
SFRP1	-0.387991	0.951	0.927	1.20944e-22	2.41888e-19
PLPP3	-0.393919	0.76	0.778	1.42655e-14	2.85311e-11
VEGFA	-0.39513	0.353	0.781	2.31817e-42	4.63633e-39
FSTL1	-0.402923	0.954	0.978	1.82752e-13	3.65504e-10
CADM3	-0.406158	0.933	0.954	2.08279e-36	4.16558e-33
VAT1	-0.408798	0.936	0.89	9.60027e-32	1.92005e-28
AOX1	-0.410762	0.94	0.956	1.20905e-31	2.4181e-28
PLA2G2A	-0.415253	0.954	0.929	7.86496e-28	1.57299e-24
GNLY	-0.41976	0.806	0.781	8.55294e-25	1.71059e-21
SCN7A	-0.425831	0.307	0.579	2.19825e-23	4.3965e-20
HLA-DRB1	-0.428204	0.731	0.809	1.09574e-09	2.19148e-06
VEGFD	-0.430723	0.06	0.49	9.05901e-72	1.8118e-68
PLXDC2	-0.430791	0.625	0.86	1.83384e-28	3.66769e-25
TIMP2	-0.432559	0.919	0.923	3.24437e-20	6.48873e-17
FIBIN	-0.434113	0.855	0.897	5.16753e-14	1.03351e-10
PCOLCE	-0.439596	0.852	0.947	2.09673e-15	4.19345e-12
FGF7	-0.444746	0.883	0.817	4.29594e-12	8.59187e-09
F10	-0.451397	0.724	0.873	1.29354e-28	2.58709e-25
CES1	-0.452019	0.82	0.841	3.16269e-18	6.32538e-15
LGALS3	-0.45954	0.961	0.992	3.61305e-25	7.22609e-22
TFPI	-0.470168	0.887	0.922	4.77561e-18	9.55122e-15
CST3	-0.478965	0.993	0.999	2.05164e-18	4.10328e-15
PRELP	-0.481011	0.845	0.922	1.37472e-19	2.74944e-16
LRP1	-0.481806	0.792	0.876	9.60809e-22	1.92162e-18
C16orf89	-0.482516	0.64	0.794	6.62371e-34	1.32474e-30
SPON2	-0.483273	0.943	0.951	4.57126e-14	9.14251e-11
SOD3	-0.485154	0.947	0.961	1.33203e-28	2.66407e-25
MFAP4	-0.487532	0.901	0.949	2.12909e-27	4.25817e-24
NBL1	-0.504324	0.739	0.863	7.39122e-33	1.47824e-29
EPHX1	-0.516708	0.724	0.829	2.90489e-23	5.80977e-20
HSD11B1	-0.524381	0.887	0.948	8.26151e-31	1.6523e-27
FCGRT	-0.524462	0.929	0.965	3.91202e-30	7.82404e-27
FBN1	-0.528286	0.908	0.974	1.57935e-20	3.15871e-17
PSAP	-0.528753	0.912	0.951	1.97446e-29	3.94892e-26
CYR61	-0.532809	0.905	0.927	7.7808e-18	1.55616e-14
IGFBP4	-0.534814	0.958	0.952	4.3582e-15	8.7164e-12
FBLN5	-0.537013	0.898	0.953	5.27211e-21	1.05442e-17
BICC1	-0.537327	0.565	0.79	4.27159e-34	8.54318e-31
PCOLCE2	-0.551583	0.958	0.976	2.30881e-29	4.61762e-26
CD34	-0.5561	0.958	0.97	1.91887e-28	3.83773e-25
COL6A1	-0.556904	0.83	0.919	4.49024e-24	8.98048e-21
COLEC12	-0.562613	0.382	0.702	2.21249e-42	4.42498e-39
HTRA3	-0.567464	0.947	0.959	1.77049e-16	3.54099e-13
GPC3	-0.568617	0.092	0.519	1.38381e-56	2.76762e-53
RARRES1	-0.582378	0.922	0.937	6.09443e-09	1.21889e-05
SFRP4	-0.583129	0.951	0.948	1.25324e-08	2.50649e-05
CTSK	-0.583374	0.972	0.978	2.1501e-13	4.30019e-10
GPX3	-0.584753	0.912	0.912	3.2866e-17	6.5732e-14
ABCA6	-0.589446	0.032	0.525	4.9701e-73	9.94019e-70
CFH	-0.596608	0.795	0.913	4.42296e-22	8.84593e-19
CKB	-0.610711	0.686	0.916	2.56191e-36	5.12382e-33
OMD	-0.612053	0.94	0.974	1.1081e-26	2.21621e-23
C1QTNF3	-0.619756	0.954	0.971	3.90648e-40	7.81296e-37
MGST1	-0.620923	0.968	0.972	5.79475e-37	1.15895e-33
TMEM176B	-0.627116	0.375	0.692	1.2912e-33	2.5824e-30
LTBP4	-0.627319	0.933	0.954	6.33518e-30	1.26704e-26
PDGFRL	-0.636666	0.958	0.965	8.32299e-30	1.6646e-26
C7	-0.65561	0.187	0.616	2.91398e-58	5.82796e-55
SERPING1	-0.656666	0.961	0.961	2.11869e-36	4.23737e-33
ACKR3	-0.660392	0.965	0.969	9.40085e-39	1.88017e-35
C1S	-0.662951	0.972	0.964	2.33457e-26	4.66913e-23
PODN	-0.663402	0.954	0.984	2.02302e-26	4.04603e-23
ITM2A	-0.692428	0.975	0.983	3.84851e-42	7.69703e-39
ABI3BP	-0.692526	0.597	0.803	1.73766e-34	3.47532e-31
EFEMP1	-0.695809	0.975	0.991	8.32875e-22	1.66575e-18
ADM	-0.715109	0.816	0.917	1.96038e-36	3.92075e-33
OLFML3	-0.73291	0.936	0.963	8.72336e-36	1.74467e-32
ABCA8	-0.737205	0.912	0.936	1.68694e-31	3.37387e-28
IER3	-0.738939	0.915	0.961	2.0776e-16	4.15519e-13
PLTP	-0.749671	0.943	0.955	4.80914e-33	9.61829e-30
EMP1	-0.765871	0.707	0.878	1.31177e-33	2.62354e-30
GPNMB	-0.778215	0.961	0.982	9.085e-33	1.817e-29
COL1A2	-0.796301	0.922	0.925	6.20974e-32	1.24195e-28
CHRDL1	-0.811579	0.954	0.978	5.33387e-40	1.06677e-36
PMP22	-0.815553	0.926	0.959	2.32656e-39	4.65312e-36
MMP2	-0.817623	0.94	0.951	4.63099e-26	9.26198e-23
WISP2	-0.81813	0.901	0.929	6.137e-36	1.2274e-32
SVEP1	-0.823337	0.06	0.619	2.67711e-92	5.35421e-89
SCARA5	-0.87442	0.965	0.979	3.99624e-35	7.99247e-32
SLPI	-0.876048	0.986	0.977	2.5546e-30	5.10919e-27
RARRES2	-0.878561	0.703	0.893	1.22871e-49	2.45743e-46
GAS1	-0.887691	0.958	0.968	6.50773e-32	1.30155e-28
IGFBP6	-0.943528	0.979	0.99	4.10257e-17	8.20514e-14
CXCL14	-0.948632	0.89	0.941	3.42625e-19	6.85251e-16
LEPR	-0.990285	0.947	0.961	3.77453e-35	7.54905e-32
GSN	-0.992409	0.993	0.977	5.55399e-27	1.1108e-23
C1R	-1.01761	0.919	0.972	3.1856e-44	6.3712e-41
TNXB	-1.0262	0.947	0.975	5.57398e-34	1.1148e-30
SLIT2	-1.04092	0.668	0.85	7.47618e-49	1.49524e-45
SELENOP	-1.04531	0.498	0.858	1.4166e-67	2.8332e-64
ALDH1A1	-1.08648	0.915	0.946	1.03002e-60	2.06005e-57
FBLN2	-1.08989	0.965	0.985	5.02969e-38	1.00594e-34
CCDC80	-1.11191	0.982	0.989	2.05473e-36	4.10946e-33
PI16	-1.12324	0.975	0.988	7.23041e-42	1.44608e-38
MYOC	-1.15024	0.965	0.958	1.25903e-38	2.51805e-35
MFAP5	-1.17803	0.972	0.986	1.64066e-44	3.28132e-41
ADH1B	-1.25076	0.986	0.987	3.39874e-42	6.79748e-39
SERPINF1	-1.42964	0.968	0.978	1.25564e-43	2.51127e-40
APOD	-1.4698	0.975	0.977	4.2587e-33	8.51741e-30
LUM	-1.50636	0.756	0.911	3.36882e-52	6.73764e-49
C3	-1.63077	0.965	0.974	3.76958e-40	7.53916e-37
SFRP2	-1.78448	0.989	0.981	4.76971e-34	9.53942e-31
DCN	-2.02794	0.993	0.968	4.00807e-51	8.01614e-48
FBLN1	-2.08517	1	0.989	1.12151e-45	2.24302e-42
CFD	-2.76574	0.996	0.996	4.15676e-45	8.31352e-42
*avg_logFC: log fold-chage of the average expression between the two groups.
**pct.1: percentage of cells where the feature is detected in the first group.
†pct.2: percentage of cells where the feature is detected in the second group.
‡p_val_adj: adjusted p-value, based on bonferroni correction using all features in the dataset.

## Sheet: Table_E6
Table E6. DEG between immature endothelial cells vs. the rest of endothelial cells.
Gene name	avg_logFC*	pct.1**	pct.2†	p_value	p_val_adjust‡
IL7R	1.34369	0.281	0.148	2.98082e-17	7.91974e-13
RGCC	1.34172	0.581	0.231	4.89136e-77	1.29958e-72
FCN3	0.899972	0.432	0.243	2.07081e-24	5.50194e-20
PLVAP	0.875285	0.508	0.361	1.09563e-21	2.91099e-17
COL4A1	0.842704	0.531	0.337	9.94241e-31	2.6416e-26
SPARC	0.828176	0.702	0.529	1.41072e-41	3.74815e-37
COL15A1	0.784552	0.295	0.059	8.57294e-59	2.27775e-54
COL4A2	0.728707	0.51	0.316	1.9654e-29	5.22186e-25
TCIM	0.725915	0.615	0.412	2.37058e-29	6.2984e-25
VWA1	0.671487	0.415	0.258	7.06107e-20	1.87606e-15
TSC22D1	0.657041	0.624	0.514	4.27905e-19	1.1369e-14
ITGA6	0.584947	0.598	0.482	3.22432e-19	8.5667e-15
ARHGAP18	0.561628	0.464	0.373	3.86584e-10	1.02712e-05
SFTPB	0.558613	0.403	0.252	2.93902e-15	7.80869e-11
CD34	0.54973	0.541	0.45	3.35819e-13	8.92237e-09
INSR	0.539217	0.324	0.248	1.56952e-07	0.00417005
NOSTRIN	0.536541	0.483	0.29	1.77664e-22	4.72036e-18
RDX	0.506846	0.737	0.683	6.20087e-16	1.64751e-11
ADGRF5	0.505787	0.661	0.483	1.2332e-23	3.27649e-19
SCGB3A2	0.491355	0.393	0.282	2.06259e-09	5.4801e-05
CEMIP2	0.489977	0.442	0.323	1.10746e-11	2.94241e-07
RFLNB	0.484215	0.297	0.136	1.62602e-22	4.32016e-18
BTNL9	0.471598	0.386	0.225	3.28975e-17	8.74054e-13
POSTN	0.461054	0.346	0.232	1.60042e-09	4.25217e-05
TSPAN13	0.422016	0.312	0.14	1.03057e-23	2.73812e-19
APLNR	0.419907	0.286	0.109	3.78086e-27	1.00454e-22
A2M	0.418427	0.875	0.852	1.49209e-22	3.96434e-18
SGK1	0.415551	0.544	0.502	8.89924e-07	0.0236444
PLCB1	0.404754	0.358	0.234	3.4221e-12	9.09218e-08
ADGRE5	0.404327	0.278	0.157	1.4141e-12	3.75713e-08
IL3RA	0.394718	0.359	0.241	8.16934e-11	2.17051e-06
LPAR6	0.394605	0.388	0.261	1.34255e-12	3.56702e-08
PCDH17	0.393789	0.693	0.609	4.61548e-09	0.000122629
ESAM	0.385936	0.664	0.556	7.36207e-15	1.95603e-10
CD200	0.384021	0.254	0.115	2.58004e-17	6.85491e-13
C11orf96	0.383878	0.307	0.179	3.20933e-13	8.52688e-09
MLEC	0.376771	0.381	0.275	8.56769e-10	2.27635e-05
MCF2L	0.356441	0.3	0.17	3.1243e-14	8.30094e-10
HLA-DRA	0.355571	0.831	0.814	3.77671e-09	0.000100343
ARHGDIB	0.353855	0.576	0.504	1.2039e-07	0.00319863
NOTCH4	0.352377	0.486	0.348	1.35561e-12	3.60173e-08
ADGRL4	0.343434	0.544	0.455	1.61711e-09	4.29651e-05
C1orf54	0.338144	0.342	0.254	1.04512e-06	0.0277677
HLA-DPA1	0.331701	0.744	0.692	3.94829e-07	0.0104902
TMEM88	0.327938	0.281	0.192	2.11793e-07	0.00562713
FAM167B	0.325787	0.402	0.276	1.98594e-09	5.27645e-05
CD93	0.321197	0.739	0.615	6.11881e-10	1.62571e-05
PDGFB	0.315752	0.295	0.171	2.84953e-12	7.57091e-08
CD74	0.296347	0.937	0.908	1.72731e-14	4.58929e-10
BCAM	0.291491	0.653	0.65	2.13637e-07	0.00567612
ANKRD28	0.290343	0.259	0.167	3.82983e-08	0.00101755
ADGRG1	0.286711	0.295	0.196	2.26454e-08	0.000601667
SPARCL1	0.285829	0.912	0.758	2.96702e-12	7.88307e-08
DGKH	0.28397	0.325	0.233	6.10635e-07	0.016224
CCDC85B	0.280442	0.656	0.665	7.87877e-07	0.0209331
PTPRK	0.27734	0.315	0.225	2.76799e-07	0.00735428
HLA-DRB1	0.271061	0.875	0.854	6.35123e-09	0.000168746
OLFML2A	0.265899	0.276	0.157	2.62729e-11	6.98046e-07
RAPGEF4	0.253131	0.259	0.171	6.01342e-07	0.0159771
*avg_logFC: log fold-chage of the average expression between the two groups.
**pct.1: percentage of cells where the feature is detected in the first group.
†pct.2: percentage of cells where the feature is detected in the second group.
‡p_val_adj: adjusted p-value, based on bonferroni correction using all features in the dataset.

## Sheet: Table_E7
Table E7. The parameters applied for subclustering of major cell types and the number of subclusters obtained through this process.
Parameters	EP	FB	EC	TC	BC	MA	MY
FindNeighbours: dims	1:10	1:2	1:2	1:20	1:10	1:2	1:20
FindCluster: resolutions	0.1	0.2	0.2	0.6	0.2	0.2	0.2
No of subclusters before adjustment	9	7	6	14	4	5	12
No of subclusters after adjustment*	6	4	4	7	2	1	8
* The count of clusters obtained after merging similar clusters and excluding the number of unspecified clusters.
EP; epithelial cell, CA; cancer cell, FB; fibroblast, EC; endothelial cell, TC; T cell, BC; B cell, MA; mast cell, MY; myeloid cell.

## Sheet: Table_E8
Table E8. Canonical marker genes used for major cell clusters and signature genes used for nomenclature of each subcluster.
Major cell type (Cannonical marker genes)	Subcluster type	Identifying genes	References (PMID)
EP	Ciliated	FOXJ1, PIFO, CAPS	30554520
(EPCAM, KRT19, KRT18)	Club	SCGB1A1, MUC5AC, MUC5B	30554520
	Alveolar type I	AGER	30554520
	Alveolar type II	SFTPC, LAMP3	30554520
	Neuroendocrine cells	GRP, CALCA, CPE	30554520
	Basal cells	HIST1H4C, STMN1, HMGB2	30554520
FB	Matrix FB	GSN, PI16, PRRX1	29590628
(DCN, IGFBP6, COL1A1)	COL1A1 Matrix FB	TCF21, CXCL14, NPNT	29590628
	Myo FB	DES, CNN1, TAGLN, MYH11	29590628
	CAF	NDUFA4L2, SYNPO2	18458534
EC	Stalk-like EC	SELP, ACKR1	29449267
(CLDN5, CDH5, VWF)	Immature EC	RGCC, INSR, VWA1	30559346
	Lymphatic EC	CCL21, LYVE1	29449267
	Tip-like EC	RAMP3, RGCC, ADAM	29449267
TC	Naïve CD4+	LTB, IL7R, GPR183	33208946
(CD3D, TRBC1, TRBC2)	γδ	GNLY, GZMB, NKG7	33208946
	NKT	XCL1, XCL2, KLRC1	33208946
	CD4 memory	DUSP4, RGCC	32286271, 33208946
	CD8+ cytotoxic	GZMK, DUSP2, CD8A	33208946
	NK cell	CD247, SPON2	33208946
	Treg	FOXP3, DUSP4, CTLA4	33208946
BC	Follicular BC	MS4A1, HLA-DRA	29988129
(CD79A, JCHAIN, MS4A1)	MALT BC	JCHAIN, IGHA1	29988129
MY	anti-inf AM	FABP4, C1QB, C1QA, MARCO	28257233, 22523386
(LYZ, MARCO, CD68)	TIM	LYZ, VCAN, LGMN	29967419
	CD1C+ DC	CD1C, FCER1A, CLEC10A	24744755
	pro-inf mo-Mac	FCN1, S100A9, VCAN, CD14, CXCL8, IL1B	25339958
	CD163+CD14+DC	CD163, CD14	31474513
	Cycling AM	STMN1, MII67, TOP2A, CDK1	29967419
	Plasmacytoid DC	IL3RA, CLEC4C	28428369
	Activated DC	CCR7, LAMP3	17312119
EP; epithelial cell, CA; cancer cell, FB; fibroblast, EC; endothelial cell, TC; T cell, BC; B cell, MA; mast cell, MY; myeloid cell.
AM; alveolar macrophage, TIM; tissue-infiltrating macrophages, mo-Mac; monocyte-derived macrophage, DC; dendritic cell,
NKT; NK T cell, CAF; cancer-associated fibroblast.

## Sheet: Table_E9
Table E9. Antibodies and experimental conditions used for this study.
Gene Name	Antibody Name	Vendor	Catalog #	Dilution
CAPS	calcyphosine mouse Ab	Novous Ab	NBP1-91746	1:1,000
CEACAM6	CEACAM6 mouse Ab	Origene	TA809254	1:200
CALCA	Anti-CGRP antibody	abcam	ab47027	1:1,000
GRP	Gastrin Releasing Peptide Rabbbit ant-Human Polyclonal Antibody	LSBio	LS-C755064	1:200
LPCAT1	LPCAT1 Rabbit Polyclonal antibody	proteintech	16112-1-AP	1:1000
SPINK1	Anti-SPINK1/P12 antibody	abcam	ab183034	01:50:00
